# Supplementary material for: Lecanicillones A–C, three dimeric isomers of spiciferone A with a cyclobutane ring from an entomopathogenic fungus Lecanicillium sp. PR-M-3
Source: Royal Society of Chemistry journal article supplement (doi:10.1039/c6ra11422a), 2016-01-01
Supplement: c6ra11422a1.pdf [file c6ra11422a1.pdf]

## Supplementary Information

### **Lecanicillones A–C, Three Dimeric Isomers of Spiciferone A with Cyclobutane Ring from an Entomopathogenic Fungus *Lecanicillium* sp. PR- M-3**

Zai-Ying Wang,<sup>a</sup> Xia-Nan Sang,<sup>a</sup> Ke Sun,<sup>b</sup> Sheng-Dong Huang,<sup>a</sup> Sheng-Shuang Chen,<sup>a</sup> Chun-Mei  
Xue,<sup>a</sup> Lan-Feng Ban,<sup>b</sup> Zhan-Lin Li,<sup>a</sup> Hui-Ming Hua,<sup>a</sup> Yue-Hu Pei<sup>a</sup> and Jiao Bai<sup>a\*</sup>

<sup>a</sup>Key Laboratory of Structure-Based Drug Design & Discovery Ministry of Education, Shenyang  
Pharmaceutical University Shenyang 110016, Liaoning, P. R. China.

<sup>b</sup>State Key Laboratory of the Discovery and Development of Novel Pesticide, Shenyang Research  
Institute of Chemical Industry Co., Ltd, Shenyang 110021, Liaoning, P. R. China.

# Contents

|                                                                                           |    |
|-------------------------------------------------------------------------------------------|----|
| 1. General experimental procedures .....                                                  | 5  |
| 2. Fungal material and fermentation .....                                                 | 5  |
| 3. Extraction and isolation .....                                                         | 5  |
| Physicochemical data .....                                                                | 6  |
| 4. Bioassays .....                                                                        | 6  |
| (1) Cytotoxic assay .....                                                                 | 6  |
| (2) Insecticidal assay .....                                                              | 8  |
| 5. The spectra of lecanicillone A ( <b>1</b> ) .....                                      | 9  |
| <b>Figure S1.</b> The UV spectrum of compound <b>1</b> .....                              | 9  |
| <b>Figure S2.</b> The IR spectrum of compound <b>1</b> .....                              | 10 |
| <b>Figure S3.</b> The HR-ESI-MS spectrum of compound <b>1</b> .....                       | 10 |
| <b>Figure S4.</b> The <sup>1</sup> H-NMR spectrum of compound <b>1</b> .....              | 11 |
| <b>Figure S5.</b> The <sup>13</sup> C-NMR spectrum of compound <b>1</b> .....             | 11 |
| <b>Figure S6.</b> The HSQC spectrum of compound <b>1</b> .....                            | 12 |
| <b>Figure S7.</b> The HMBC spectrum of compound <b>1</b> .....                            | 12 |
| <b>Figure S8.</b> The NOESY spectrum of compound <b>1</b> .....                           | 13 |
| Computational details for ECD of compound <b>1</b> .....                                  | 13 |
| <b>Figure S9.</b> B3LYP/6-31 G* optimized lowest energy 3D conformers of <b>1</b> . ..... | 20 |
| <b>Figure S10.</b> Experimental and suitable calculated ECD spectra of <b>1</b> .....     | 21 |
| X-ray Crystallographic Analysis of lecanicillone A ( <b>1</b> ) .....                     | 21 |
| <b>Figure S11.</b> X-ray structure of lecanicillone A ( <b>1</b> ) .....                  | 22 |
| 6. The spectra of lecanicillone B ( <b>2</b> ) .....                                      | 22 |
| <b>Figure S12.</b> The UV spectrum of compound <b>2</b> .....                             | 22 |
| <b>Figure S13.</b> The IR spectrum of compound <b>2</b> .....                             | 23 |

|                                                                                                |    |
|------------------------------------------------------------------------------------------------|----|
| <b>Figure S14.</b> The HR-ESI-MS spectrum of compound <b>2</b> .....                           | 24 |
| <b>Figure S15.</b> The <sup>1</sup> H-NMR spectrum of compound <b>2</b> .....                  | 24 |
| <b>Figure S16.</b> The <sup>13</sup> C-NMR spectrum of compound <b>2</b> .....                 | 25 |
| <b>Figure S17.</b> The HSQC spectrum of compound <b>2</b> .....                                | 25 |
| <b>Figure S18.</b> The HMBC spectrum of compound <b>2</b> .....                                | 26 |
| <b>Figure S19.</b> The NOESY spectrum of compound <b>2</b> .....                               | 26 |
| Computational details for ECD of compound <b>2</b> .....                                       | 27 |
| <b>Figure S20.</b> B3LYP/6-31 G* optimized lowest energy 3D conformer of <b>2</b> .....        | 30 |
| <b>Figure S21.</b> Experimental and suitable calculated ECD spectra of <b>2</b> .....          | 30 |
| 8. The spectra of lecanicillone C ( <b>3</b> ) .....                                           | 31 |
| <b>Figure S22.</b> The UV spectrum of compound <b>3</b> .....                                  | 31 |
| <b>Figure S23.</b> The IR spectrum of compound <b>3</b> .....                                  | 31 |
| <b>Figure S24.</b> The HR-ESI-MS spectrum of compound <b>3</b> .....                           | 32 |
| <b>Figure S25.</b> The <sup>1</sup> H-NMR spectrum of compound <b>3</b> .....                  | 32 |
| <b>Figure S26.</b> The <sup>13</sup> C-NMR spectrum of compound <b>3</b> .....                 | 33 |
| <b>Figure S27.</b> The HSQC spectrum of compound <b>3</b> .....                                | 33 |
| <b>Figure S28.</b> The HMBC spectrum of compound <b>3</b> .....                                | 34 |
| <b>Figure S29.</b> The <sup>1</sup> H- <sup>1</sup> H COSY spectrum of compound <b>3</b> ..... | 34 |
| <b>Figure S30.</b> The NOESY spectrum of compound <b>3</b> .....                               | 35 |
| Computational details for ECD of compound <b>3</b> .....                                       | 35 |
| <b>Figure S31.</b> B3LYP/6-31 G* optimized lowest energy 3D conformer of <b>3</b> .....        | 42 |
| <b>Figure S32.</b> Experimental and suitable calculated ECD spectra of <b>3</b> .....          | 43 |
| 9. The spectra of spiciferone A ( <b>4</b> ) .....                                             | 43 |
| <b>Figure S33.</b> The <sup>1</sup> H-NMR spectrum of compound <b>4</b> .....                  | 43 |
| <b>Figure S34.</b> The <sup>13</sup> C-NMR spectrum of compound <b>4</b> .....                 | 44 |

|                                                                                                                                                                       |    |
|-----------------------------------------------------------------------------------------------------------------------------------------------------------------------|----|
| 10. Photochemical synthesis of spiciferone A dimers .....                                                                                                             | 44 |
| 11. HPLC/DAD analyses of photoreaction mixtures and crude EtOAc extract of strain PR-M-3 .....                                                                        | 44 |
| <b>Figure S35.</b> HPLC analysis of the reaction mixture using MeOH-H <sub>2</sub> O (70:30, 1 mL/min) as eluent .....                                                | 45 |
| <b>Figure S36.</b> HPLC analysis of photoreaction mixtures in different solvents at 5 <sup>th</sup> day using MeOH-H <sub>2</sub> O (70:30, 1 mL/min) as eluent ..... | 46 |
| <b>Figure S37.</b> HPLC analysis of crude EtOAc extract of strain PR-M-3 using MeOH-H <sub>2</sub> O (5:95-100:0, 1 mL/min) gradient elution .....                    | 46 |

## 1. General experimental procedures

Optical rotation was measured on Rudolph Autopol-V digital polarimeter and Jasco P-2000 polarimeter. UV spectrum was recorded using a Shimadzu UV-2201 spectrometer. IR spectra were recorded on a Bruker IFS-55 spectrometer (using a KBr disk method). CD spectra were measured on Bio-logic MOS 450 spectropolarimeter. 1D and 2D NMR spectra were acquired with Bruker ARX-300 and AV-600 NMR spectrometers using solvent signals ( $\text{CDCl}_3$ :  $\delta_{\text{H}}$  7.26/ $\delta_{\text{C}}$  77.16), with tetramethylsilane (TMS) as an internal standard. Mass spectra were obtained using Varian QFT-ESI and Bruker micro-TOFQ-Q mass spectrometer (for HRESIMS). Single crystal X-ray crystallography was determined on Gemini E X-ray single crystal diffractometer.

Column chromatography (CC) was performed with silica (100-200 and 200-300 mesh, Qingdao Haiyang Chemical Co., Ltd., Qingdao, China) and Sephadex LH-20 (GE Healthcare, Sweden).

## 2. Fungal material and fermentation

The fungal strain PR-M-3 was isolated from the soil of a garden of puer tea at Puer in Yunnan, P.R. China in September 2011. It was identified as *Lecanicillium* sp. (GenBank accession no. KP260559) and has been deposited in the School of Traditional Chinese Materia Medica, Shenyang Pharmaceutical University.

The fungus PR-M-3 was cultured on a rotary shaker (180 rpm) at 28 °C for 7 days in liquid medium (containing mannitol 2%, D-glucose 2%, yeast extract 0.5%, peptone 0.5%,  $\text{KH}_2\text{PO}_4$  0.05%,  $\text{MgSO}_4$  0.03%, corn syrup 0.1%).

## 3. Extraction and isolation

The fermentation broth (120 L) of the strain was concentrated and extracted with ethyl acetate and *n*-butanol, successively. The EtOAc crude extracts (35.0 g) were applied on a silica gel column and eluted with Petroleum-Acetone gradient (from 100:0 to 0:100) to afford 14 fractions. Fr. 4 (0.5133 g) was further purified using silica gel column chromatography eluting with Petroleum-ethyl acetate (from 100:0 to 0:100) to give 10 subfractions. Fr. 3 (0.8762 g) was further purified using silica gel column

chromatography eluting with Petroleum-Acetone (from 100:0 to 0:100) to give 8 subfractions. Fr.3-2 was further purified using preparative thin layer chromatography with Petroleum-Acetone (5:1) to give 4 subfractions. Fr.3-2-2 purified by semi-preparative HPLC on ODS column eluted with 53% MeOH-H<sub>2</sub>O to yield compound **4** (56.2 mg). Fr.3-2-4 purified by semi-preparative HPLC on ODS column eluted with 62% MeOH-H<sub>2</sub>O to yield compounds **3** (7.2 mg), **1** (106.2 mg), and **2** (3.2 mg).

#### Physicochemical data

**10**

Lecanicillone A (**1**): a colorless block crystal (EtOAc);  $[\alpha]_D^{25}$  (*c* 1.08, MeOH) +170.3; UV (MeOH)  $\lambda_{\max}$  (log  $\epsilon$ ): 260 (4.1), 214 (4.0), 204 (3.9) nm; IR (KBr)  $\nu_{\max}$ : 1717, 1662, 1625, 1434, 1174 cm<sup>-1</sup>; CD (MeOH)  $\lambda_{\max}$  ( $\Delta\epsilon$ ): 194 (+2.6), 202 (-14.4), 227 (+3.8), 262 (+28.6) 293 (-3.6) nm; <sup>13</sup>C and <sup>1</sup>H NMR data, see Table 1; (+)-HRESIMS *m/z* 465.2276 [M+H]<sup>+</sup> (calcd for C<sub>28</sub>H<sub>32</sub>O<sub>6</sub>, 465.2272);

**10**

Lecanicillone B (**2**): a white amorphous powder;  $[\alpha]_D^{25}$  (*c* 0.15, MeOH) -107.0; UV (MeOH)  $\lambda_{\max}$  (log  $\epsilon$ ): 260 (4.2), 214 (4.1), 204 (4.0) nm; IR (KBr)  $\nu_{\max}$ : 1716, 1663, 1625, 1432, 1176cm<sup>-1</sup>; CD (MeOH)  $\lambda_{\max}$  ( $\Delta\epsilon$ ): 194 (-5.2), 207 (+14.2), 221 (-1.8), 260 (-21.3) 290 (+4.4) nm; <sup>13</sup>C and <sup>1</sup>H NMR data, see Table 1; (+)-HRESIMS *m/z* 465.2257 [M+H]<sup>+</sup> (calcd for C<sub>28</sub>H<sub>32</sub>O<sub>6</sub>, 465.2272);

**10**

Lecanicillone C (**3**): a white amorphous powder;  $[\alpha]_D^{25}$  (*c* 0.11, MeOH) +28; UV (MeOH)  $\lambda_{\max}$  (log  $\epsilon$ ): 256 (4.1), 207(4.0) nm; IR (KBr)  $\nu_{\max}$ : 1713, 1659, 1619, 1429, 1184cm<sup>-1</sup>; CD (MeOH)  $\lambda_{\max}$  ( $\Delta\epsilon$ ): 200 (+4.1), 219 (+12.4), 254 (+0.3), 273 (+1.3) nm; <sup>13</sup>C and <sup>1</sup>H NMR data, see Table 1; (+)-HRESIMS *m/z* 465.2262 [M+H]<sup>+</sup> (calcd for C<sub>28</sub>H<sub>32</sub>O<sub>6</sub>, 465.2272);

## 4. Bioassays

### (1) Cytotoxic assay

Cytotoxic activities of isolated compounds **1–4** and the positive control 5-fluorouracil were evaluated by the trypan blue method<sup>[1, 2]</sup> against the human leukaemia cell lines (HL-60), and the MTT assay<sup>[3, 4]</sup> against the human colon cancer cells lines (HCT-116),

and the human pancreatic cancer cell lines (ASPC1). The cell lines were purchased from America Type Culture Collection, ATCC (Rockville, MD, USA) and cultured in RPMI-1640 medium (Gibco, New York, NY, USA) supplemented with 100 U/mL penicillin, 100 µg/mL streptomycin, 1 mM glutamine and 10% heat-inactivated foetal bovine serum (Gibco) at 37 °C in humidified atmosphere with 5% CO<sub>2</sub>.

Human leukemia HL-60 cells (American Type Culture Collection, Rockville, MD, USA) were cultured in the above medium at a density of 5×10<sup>4</sup> cells/mL at 37 under an atmosphere of 5% CO<sub>2</sub>. Cell growth inhibition assay was performed as reported previously. The compounds were dissolved in DMSO, and the amount of DMSO was controlled lower than 0.1% in the final concentration. Cells were incubated with various drug concentrations for 3 days. The number of cells was determined by hemocytometer, and its viability was determined using trypan blue staining. The growth inhibitory ability of the compound was calculated and expressed using the IC<sub>50</sub> value (half-inhibitory concentration). 5-Fluorouracil (5-FU) and 0.1% DMSO were used as a positive control and a negative control, respectively.

In the MTT assay, briefly, cells suspensions, 200 µl, at a density of 2.5×10<sup>4</sup> cells/mL, were plated in 96-well microtiter plates and incubated for 24 h at 37 °C under 5% CO<sub>2</sub> and 95% air. Then the test compounds with different concentrations in DMSO were placed into each microtiter plates and further incubated for 72 h. Finally, 50 µl of a 0.4% MTT solution was added to each well and incubated for 4 h. Then, the MTT was removed from the wells and the fromazan crystals were dissolved in DMSO (200 µL) for 10 min with shaking. Then the plate was read immediately on a microtiter plate reader (Bio-RAD) at a wavelength of 570 nm to record the optical density (OD). The IC<sub>50</sub> value was defined as the concentration of the control in the MTT assay. 5-Fluorouracil (5-Fu) was used as a positive control.

### References:

- [1] F. Wang, H. M. Hua, Y. H. Pei, D. Chen, and Y. K. Jing, *J. Nat. Prod.*, 2006, 69, 807-810.
- [2] J. Hu, X. D. Shi, J. G. Chen, X. Mao, L. Zhu, L. YU, and J. Y. Shi, *Food Chem.*, 2014, 148, 437–444.
- [3] K. B. Wang, Y. T. Di, Y. Bao, C.M. Yuan, G. Chen, D. H. Li, J. Bai, H. P. He, X. J. Hao, Y. H. Pei, Y. K. Jing, Z. L. Li, and H. M. Hua, *Org. Lett.*, 2014, 16, 4028–4031.

[4] K. B. Wang, C. M. Yuan, C. M. Xue, D. H. Li, Y. K. Jing, H. P. He, X. J. Hao, Y. T. Di, Z. L. Li, and H. M. Hua, *RSC Adv.*, 2014, 4, 53725–53729.

**Table S1.** The *in vitro* cytotoxic activities against HL-60, HCT-116 and ASPC1 cancer cell lines

| Compounds | HL-60                 | HCT-116               | ASPC1                 |
|-----------|-----------------------|-----------------------|-----------------------|
|           | IC <sub>50</sub> (μM) | IC <sub>50</sub> (μM) | IC <sub>50</sub> (μM) |
| 1         | 47.8                  | >100                  | >100                  |
| 2         | 89.0                  | >100                  | >100                  |
| 3         | 53.0                  | >100                  | >100                  |
| 4         | >100                  | 31.8                  | 32.3                  |
| 5-Fu      | 2.80                  | 15.6                  | 2.7                   |

(2) *Insecticidal assay*

a. Test against diamondback moth (*Plutella xylostella*)

The leaves of cabbage grown in greenhouse were chosen, removed the surface waxy layer and perforate to get 2cm diameter leaf discs by the hole puncher. The solution of the test compound (600 mg/L) was sprayed using Airbrush, placed in 9cm diameter Petri dish and dried at room temperature. Seven regular health insects (third instar) were introduced on each treatment. Each treatment was repeated for 4 times. The pure water was set as CK. The treated insects were placed in a chamber of 25±1°C, 60%-70% relative humidity and day light. After 72h, the number of surviving insects was investigated and the mortality was calculated.

b. Test against army worm (*Mythimna separate*)

The middle part of fresh corn leaves were chosen and cut into 5cm sects. The solution of the test compound (600 mg/L) was sprayed using Airbrush, placed in 9cm diameter Petri dish and dried at room temperature. Seven regular health insects (third instar) were introduced on each treatment. Each treatment was repeated for 4 times. The pure water was set as CK. The treated insects were placed in a chamber of 25±1°C, 60%-70% relative humidity and day light. After 72h, the number of surviving insects was investigated and the mortality was calculated.

c. Test against peach aphid (*Myzus persicae*)

The cabbage leaves with 30-50 peach aphids were taken, the solution of the test



compound (600 mg/L) was sprayed using Airbrush, placed in 9cm diameter Petri dish and dried at room temperature. Each treatment was repeated for 4 times. The pure water was set as CK. The treated insects were placed in a chamber of  $25\pm 1^\circ\text{C}$ , 60%-70% relative humidity and day light. After 48h, the survival peach aphids were observed and the mortality was determined.

d. Test against spider mite (*Tetranychus cinnabarinus*)

The adult spider mites were treated into two true leaves of bean plants. After investigated the number of mites, the solution of the test compound (600 mg/L) was sprayed using Airbrush and repeated for 4 times. The pure water was set as CK. The treated bean plants were placed in a chamber of  $25\pm 1^\circ\text{C}$ , 60%-70% relative humidity and day light. After 72h, the number of surviving mites was investigated and the mortality was calculated.

## 5. The spectra of lecanicillone A (1)

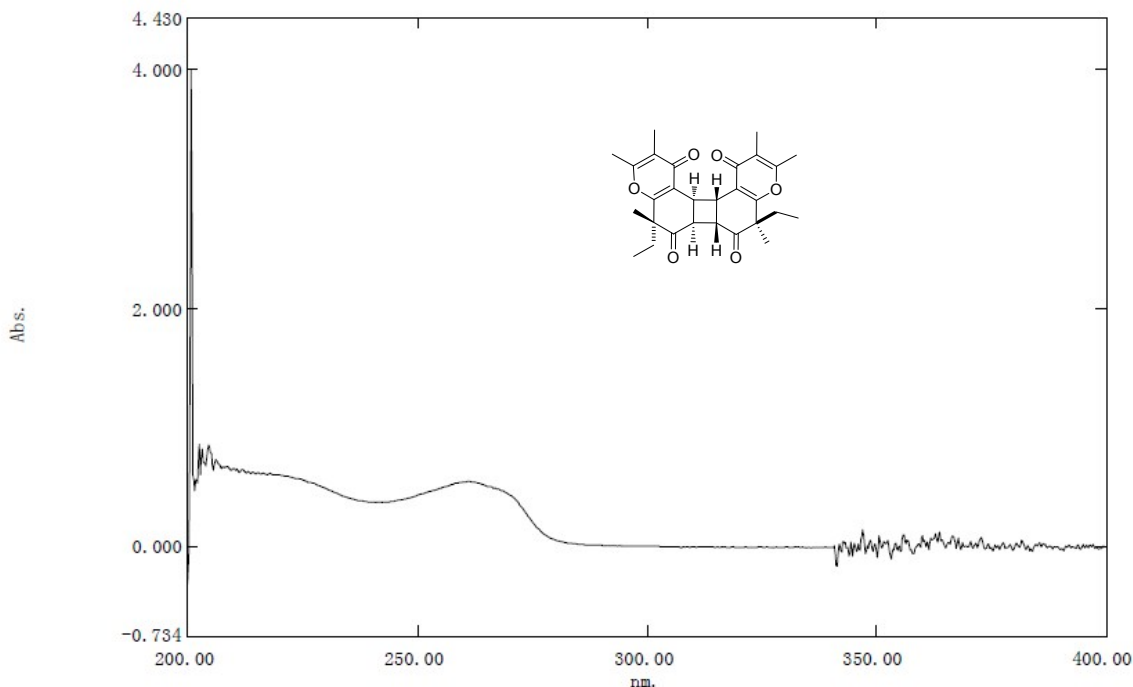

**Figure S1.** The UV spectrum of compound 1

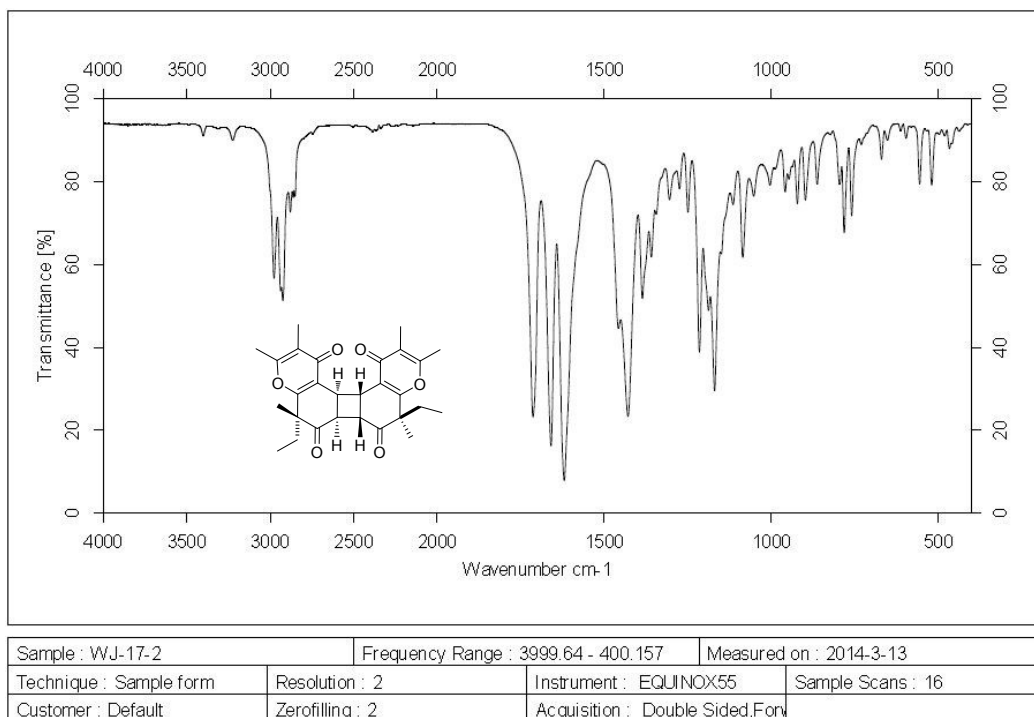

**Figure S2.** The IR spectrum of compound **1**

### Mass Spectrum Molecular Formula Report

#### Analysis Info

Analysis Name D:\Data\20131031-CEYANGWJ-17\_1-c,7\_01\_1993.d  
 Method ldj\_bga\_jh.m  
 Sample Name WJ-17  
 Comment

Acquisition Date 10/31/2013 4:18:20 PM

Operator Bruker Customer  
 Instrument / Ser# micrOTOF-Q 125

#### Acquisition Parameter

|             |          |                       |           |                  |           |
|-------------|----------|-----------------------|-----------|------------------|-----------|
| Source Type | ESI      | Ion Polarity          | Positive  | Set Nebulizer    | 0.3 Bar   |
| Focus       | Active   | Set Capillary         | 4500 V    | Set Dry Heater   | 180 °C    |
| Scan Begin  | 50 m/z   | Set End Plate Offset  | -500 V    | Set Dry Gas      | 4.0 l/min |
| Scan End    | 1000 m/z | Set Collision Cell RF | 250.0 Vpp | Set Divert Valve | Source    |

#### Generate Molecular Formula Parameter

|                  |           |                        |       |         |   |
|------------------|-----------|------------------------|-------|---------|---|
| Formula, min.    | C28H32O6H |                        |       |         |   |
| Formula, max.    |           |                        |       |         |   |
| Measured m/z     | 465.228   | Tolerance              | 5 ppm | Charge  | 1 |
| Check Valence    | no        | Minimum                | 0     | Maximum | 0 |
| Nitrogen Rule    | no        | Electron Configuration | both  |         |   |
| Filter H/C Ratio | no        | Minimum                | 0     | Maximum | 3 |
| Estimate Carbon  | yes       |                        |       |         |   |

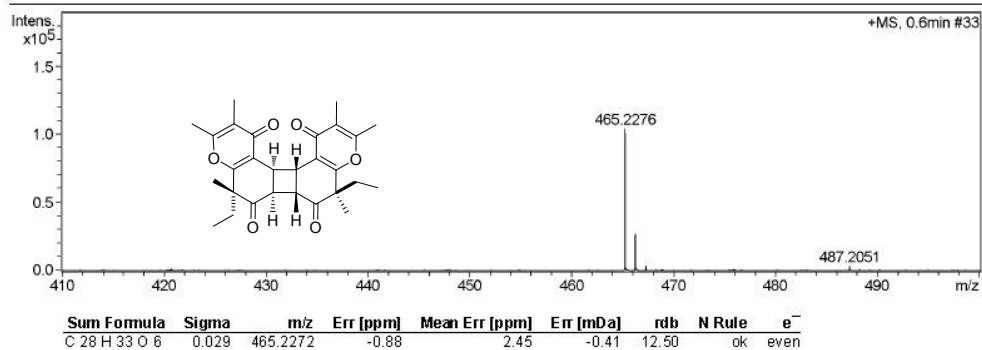

**Figure S3.** The HR-ESI-MS spectrum of compound **1**

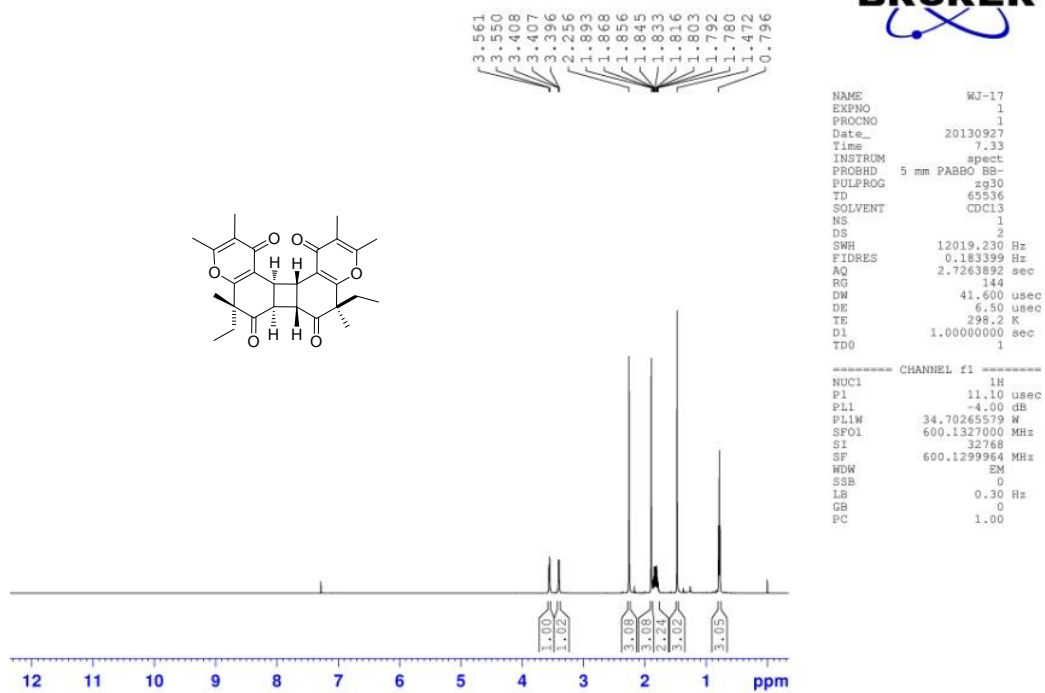

Figure S4. The <sup>1</sup>H-NMR spectrum of compound 1

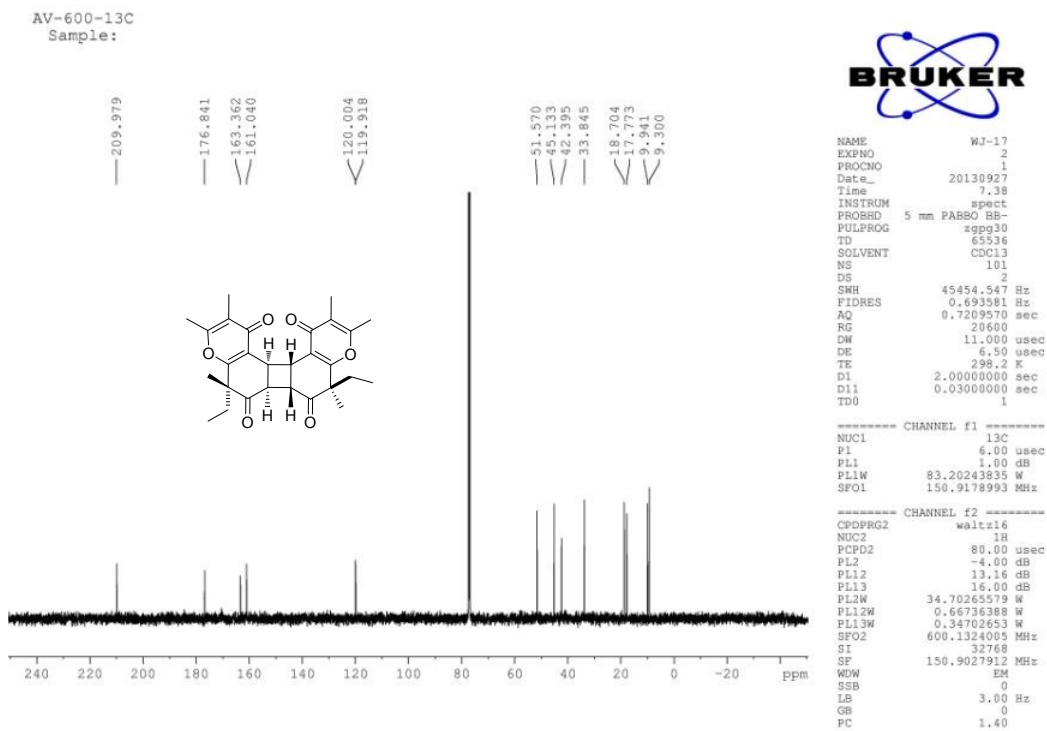

Figure S5. The <sup>13</sup>C-NMR spectrum of compound 1

AV-600-HSQC  
Sample:

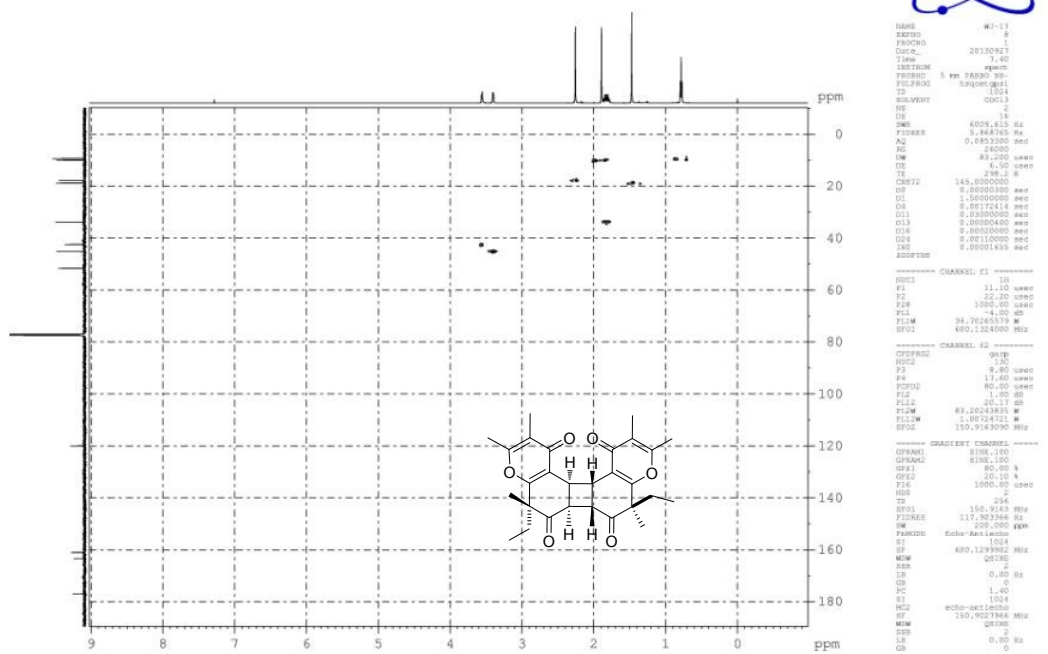

Figure S6. The HSQC spectrum of compound 1

AV-600-HMBC  
Sample:

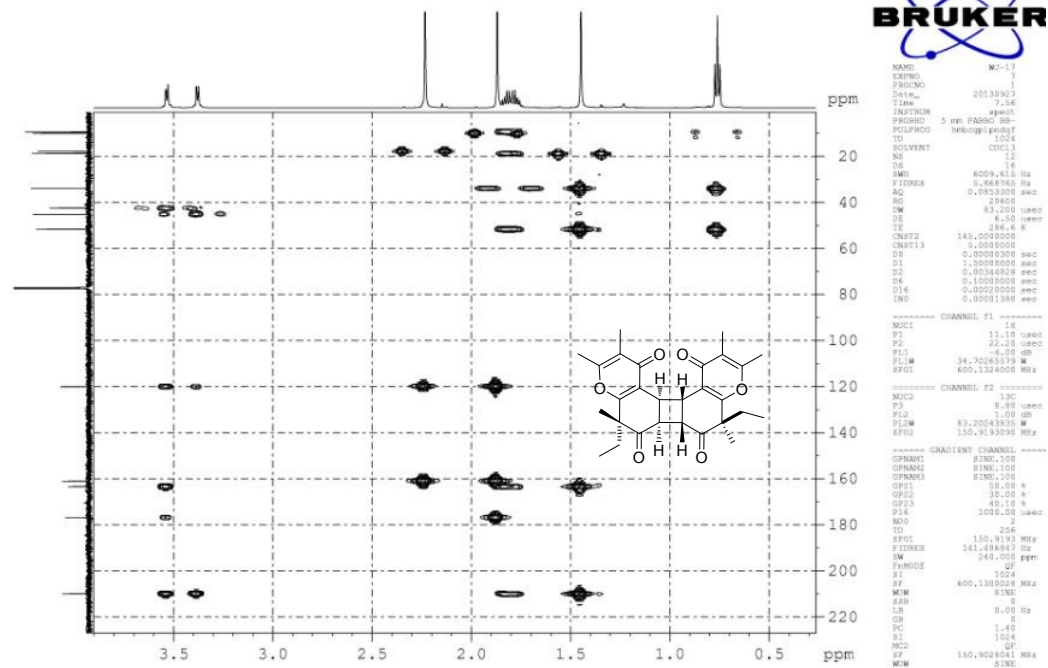

Figure S7. The HMBC spectrum of compound 1

AV-600-NOESY  
Sample:

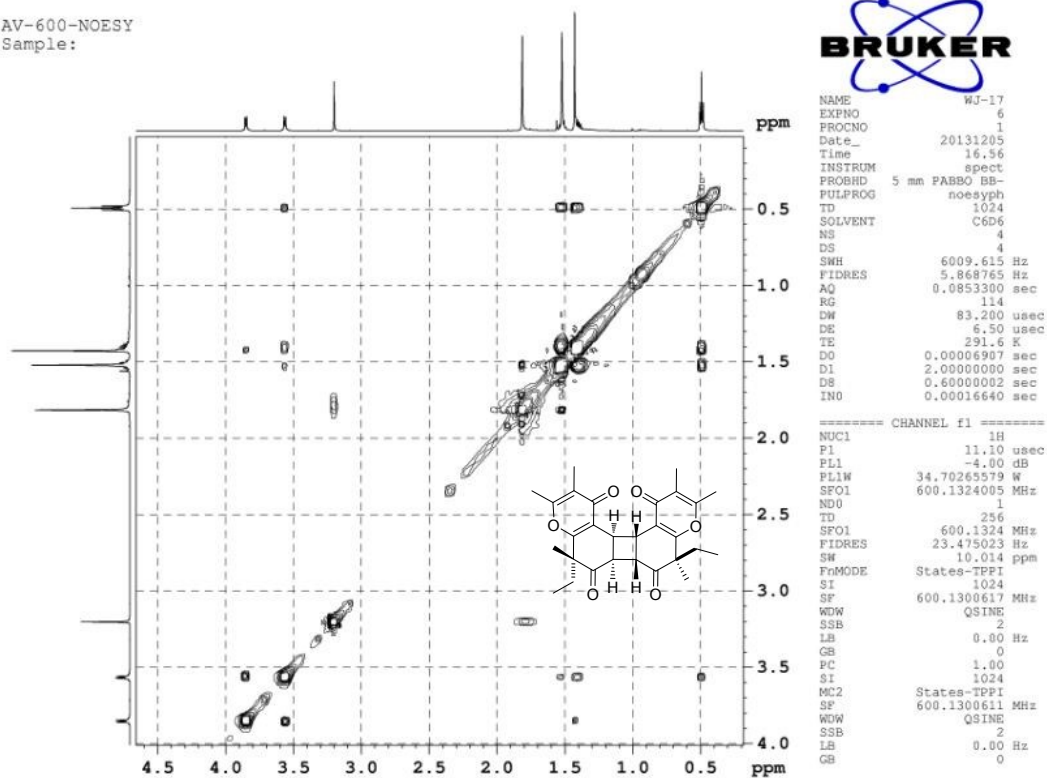

**Figure S8.** The NOESY spectrum of compound **1**

## Computational details for ECD of compound **1**

### Computational method

The Spartan 14.0 (Wavefunction Inc., Irvine, CA, USA) searches using molecular mechanics MMFF were performed for **compound 1**, which gave 9 conformers, The low-energy conformers of **compound 1** accounting for more than 5% Boltzmann distribution were further optimized successively in the gas phase by semi-empirical method and the Hartree-Fork (HF) method at the 6-31G (d) level in Gaussian 09 program package,<sup>[1]</sup> which was reoptimized and analysed frequency, orderly, using the density functional theory (DFT) at the B3LYP/6-31G (d, p) level and the same way in the methanol, resulted in no imaginary frequencies. Solvent effects were taken into consideration by using the conductor polarizable continuum model (CPCM). The conformers of **compound 1** were calculated electronic circular dichroism (ECD) by the time-dependent density functional theory (TD-DFT) method at the B3LYP/6-31G (d, p) level with the CPCM model in methanol solution. The overall calculated ECD curves of the **compound**

**1** were generated severally by Boltzmann weighting of their selected low-energy conformers using SpecDis 1.51 [2-3] with  $\sigma = 0.2\text{eV}$  at -10 nm shift.

**Table S2.** Energy analysis of compound **1**

| Label      | MMFF            |                 |
|------------|-----------------|-----------------|
|            | rel. E(Kal/mol) | Boltzmann Dist. |
| <b>1-1</b> | 0.00            | 0.711           |
| <b>1-2</b> | 4.96            | 0.096           |
| <b>1-3</b> | 4.96            | 0.096           |

**Table S3.** Computational details for ECD of compound **1**

**1-1**

Standard orientation:

| Center Number | Atomic Number | Atomic Type | Coordinates (Angstroms) |           |           |
|---------------|---------------|-------------|-------------------------|-----------|-----------|
|               |               |             | X                       | Y         | Z         |
| 1             | 6             | 0           | 0.381174                | 1.811977  | 0.413886  |
| 2             | 6             | 0           | 0.342678                | 0.699395  | -1.924218 |
| 3             | 6             | 0           | -0.763810               | 3.086430  | -1.517703 |
| 4             | 6             | 0           | -0.576407               | 1.819672  | -2.379861 |
| 5             | 6             | 0           | -0.197932               | 2.917341  | -0.119226 |
| 6             | 6             | 0           | 0.550466                | 0.570839  | -0.396913 |
| 7             | 6             | 0           | -0.550466               | -0.570839 | -0.396913 |
| 8             | 6             | 0           | -0.342678               | -0.699395 | -1.924218 |
| 9             | 6             | 0           | 0.576407                | -1.819672 | -2.379861 |
| 10            | 6             | 0           | 0.763810                | -3.086430 | -1.517703 |
| 11            | 6             | 0           | 0.197932                | -2.917341 | -0.119226 |
| 12            | 6             | 0           | -0.381174               | -1.811977 | 0.413886  |
| 13            | 8             | 0           | -0.342678               | 4.055447  | 0.606081  |
| 14            | 6             | 0           | 0.081920                | 4.148328  | 1.903713  |
| 15            | 6             | 0           | 0.702851                | 3.106182  | 2.521368  |
| 16            | 6             | 0           | 0.917676                | 1.863515  | 1.775131  |
| 17            | 6             | 0           | -0.917676               | -1.863515 | 1.775131  |
| 18            | 6             | 0           | -0.702851               | -3.106182 | 2.521368  |
| 19            | 6             | 0           | -0.081920               | -4.148328 | 1.903713  |
| 20            | 8             | 0           | 0.342678                | -4.055447 | 0.606081  |
| 21            | 8             | 0           | 1.537312                | 0.899898  | 2.270520  |
| 22            | 8             | 0           | -1.537312               | -0.899898 | 2.270520  |
| 23            | 6             | 0           | 1.212189                | 3.144527  | 3.937211  |
| 24            | 6             | 0           | -0.237879               | 5.507163  | 2.441747  |
| 25            | 6             | 0           | -1.212189               | -3.144527 | 3.937211  |

|    |   |   |           |           |           |
|----|---|---|-----------|-----------|-----------|
| 26 | 6 | 0 | 0.237879  | -5.507163 | 2.441747  |
| 27 | 8 | 0 | 1.144763  | -1.739987 | -3.458721 |
| 28 | 8 | 0 | -1.144763 | 1.739987  | -3.458721 |
| 29 | 1 | 0 | 1.524840  | 0.129186  | -0.171605 |
| 30 | 1 | 0 | -1.524840 | -0.129186 | -0.171605 |
| 31 | 1 | 0 | 1.252879  | 0.772918  | -2.530731 |
| 32 | 1 | 0 | -1.252879 | -0.772918 | -2.530731 |
| 33 | 6 | 0 | -2.284816 | 3.387333  | -1.424127 |
| 34 | 6 | 0 | -0.065181 | 4.279801  | -2.253640 |
| 35 | 6 | 0 | 1.453068  | 4.165207  | -2.425049 |
| 36 | 6 | 0 | 0.065181  | -4.279801 | -2.253640 |
| 37 | 6 | 0 | 2.284816  | -3.387333 | -1.424127 |
| 38 | 6 | 0 | -1.453068 | -4.165207 | -2.425049 |
| 39 | 1 | 0 | 2.302588  | 3.037419  | 3.953392  |
| 40 | 1 | 0 | 0.806381  | 2.300967  | 4.505051  |
| 41 | 1 | 0 | 0.951235  | 4.066020  | 4.456904  |
| 42 | 1 | 0 | 0.240075  | 6.275606  | 1.824569  |
| 43 | 1 | 0 | -1.318993 | 5.680057  | 2.404183  |
| 44 | 1 | 0 | 0.098355  | 5.629615  | 3.469253  |
| 45 | 1 | 0 | -0.951235 | -4.066020 | 4.456904  |
| 46 | 1 | 0 | -0.806381 | -2.300967 | 4.505051  |
| 47 | 1 | 0 | -2.302588 | -3.037419 | 3.953392  |
| 48 | 1 | 0 | -0.240075 | -6.275606 | 1.824569  |
| 49 | 1 | 0 | -0.098355 | -5.629615 | 3.469253  |
| 50 | 1 | 0 | 1.318993  | -5.680057 | 2.404183  |
| 51 | 1 | 0 | -2.694518 | 3.512269  | -2.428186 |
| 52 | 1 | 0 | -2.446713 | 4.307208  | -0.857998 |
| 53 | 1 | 0 | -2.822097 | 2.574299  | -0.926613 |
| 54 | 1 | 0 | -0.545966 | 4.368256  | -3.233130 |
| 55 | 1 | 0 | -0.306475 | 5.189646  | -1.695332 |
| 56 | 1 | 0 | 1.837496  | 5.058831  | -2.926458 |
| 57 | 1 | 0 | 1.968618  | 4.078066  | -1.462748 |
| 58 | 1 | 0 | 1.735442  | 3.301882  | -3.037504 |
| 59 | 1 | 0 | 0.306475  | -5.189646 | -1.695332 |
| 60 | 1 | 0 | 0.545966  | -4.368256 | -3.233130 |
| 61 | 1 | 0 | 2.694518  | -3.512269 | -2.428186 |
| 62 | 1 | 0 | 2.446713  | -4.307208 | -0.857998 |
| 63 | 1 | 0 | 2.822097  | -2.574299 | -0.926613 |
| 64 | 1 | 0 | -1.968618 | -4.078066 | -1.462748 |
| 65 | 1 | 0 | -1.735442 | -3.301882 | -3.037504 |
| 66 | 1 | 0 | -1.837496 | -5.058831 | -2.926458 |

## 1-2

Standard orientation:

| Center<br>Number | Atomic<br>Number | Atomic<br>Type | Coordinates (Angstroms) |   |   |
|------------------|------------------|----------------|-------------------------|---|---|
|                  |                  |                | X                       | Y | Z |

---

|    |   |   |           |           |           |
|----|---|---|-----------|-----------|-----------|
| 1  | 6 | 0 | 1.837388  | 0.362641  | 0.380185  |
| 2  | 6 | 0 | 0.605940  | -1.914933 | 0.370369  |
| 3  | 6 | 0 | 3.018033  | -1.647373 | -0.716916 |
| 4  | 6 | 0 | 1.695453  | -2.428683 | -0.554205 |
| 5  | 6 | 0 | 2.916710  | -0.231711 | -0.182730 |
| 6  | 6 | 0 | 0.557588  | -0.380074 | 0.556897  |
| 7  | 6 | 0 | -0.575143 | -0.335974 | -0.551831 |
| 8  | 6 | 0 | -0.786368 | -1.853050 | -0.302573 |
| 9  | 6 | 0 | -1.923773 | -2.145903 | 0.662227  |
| 10 | 6 | 0 | -3.249093 | -1.390828 | 0.443036  |
| 11 | 6 | 0 | -2.946419 | 0.053150  | 0.067240  |
| 12 | 6 | 0 | -1.770094 | 0.544054  | -0.396352 |
| 13 | 8 | 0 | 4.091222  | 0.435031  | -0.336078 |
| 14 | 6 | 0 | 4.237662  | 1.736921  | 0.063871  |
| 15 | 6 | 0 | 3.223847  | 2.411938  | 0.665586  |
| 16 | 6 | 0 | 1.944053  | 1.730544  | 0.894100  |
| 17 | 6 | 0 | -1.685521 | 1.940268  | -0.828147 |
| 18 | 6 | 0 | -2.891037 | 2.755200  | -0.633597 |
| 19 | 6 | 0 | -4.012671 | 2.173837  | -0.134699 |
| 20 | 8 | 0 | -4.042673 | 0.843097  | 0.191712  |
| 21 | 8 | 0 | 1.009773  | 2.276948  | 1.502601  |
| 22 | 8 | 0 | -0.656228 | 2.404591  | -1.344990 |
| 23 | 6 | 0 | 3.315403  | 3.833883  | 1.147570  |
| 24 | 6 | 0 | 5.619553  | 2.208767  | -0.262208 |
| 25 | 6 | 0 | -2.785432 | 4.201590  | -1.031810 |
| 26 | 6 | 0 | -5.349315 | 2.786304  | 0.141633  |
| 27 | 8 | 0 | -1.802653 | -2.966329 | 1.555310  |
| 28 | 8 | 0 | 1.548230  | -3.485516 | -1.145454 |
| 29 | 1 | 0 | 0.118572  | -0.111253 | 1.521422  |
| 30 | 1 | 0 | -0.113534 | -0.151188 | -1.526253 |
| 31 | 1 | 0 | 0.642116  | -2.515073 | 1.286875  |
| 32 | 1 | 0 | -0.920382 | -2.478786 | -1.192356 |
| 33 | 6 | 0 | 3.371259  | -1.606808 | -2.226203 |
| 34 | 6 | 0 | 4.139461  | -2.439081 | 0.035427  |
| 35 | 6 | 0 | 3.960641  | -2.574393 | 1.549942  |
| 36 | 6 | 0 | -4.000984 | -2.049331 | -0.771150 |
| 37 | 6 | 0 | -4.101672 | -1.454197 | 1.725113  |
| 38 | 6 | 0 | -4.398738 | -3.515809 | -0.580842 |
| 39 | 1 | 0 | 2.505318  | 4.428016  | 0.712637  |
| 40 | 1 | 0 | 4.263847  | 4.309563  | 0.899998  |
| 41 | 1 | 0 | 3.180837  | 3.875038  | 2.233775  |
| 42 | 1 | 0 | 6.359488  | 1.562585  | 0.221518  |
| 43 | 1 | 0 | 5.790828  | 2.150823  | -1.342401 |
| 44 | 1 | 0 | 5.787935  | 3.233479  | 0.062425  |
| 45 | 1 | 0 | -2.539659 | 4.281963  | -2.095898 |
| 46 | 1 | 0 | -3.698657 | 4.765773  | -0.845052 |



|    |   |   |           |           |           |
|----|---|---|-----------|-----------|-----------|
| 47 | 1 | 0 | -1.964648 | 4.680446  | -0.487840 |
| 48 | 1 | 0 | -6.126764 | 2.256848  | -0.418932 |
| 49 | 1 | 0 | -5.379965 | 3.839227  | -0.130891 |
| 50 | 1 | 0 | -5.591914 | 2.692973  | 1.205554  |
| 51 | 1 | 0 | 3.418018  | -2.625217 | -2.615028 |
| 52 | 1 | 0 | 4.338931  | -1.122741 | -2.372247 |
| 53 | 1 | 0 | 2.618383  | -1.052815 | -2.794548 |
| 54 | 1 | 0 | 4.185207  | -3.431089 | -0.425436 |
| 55 | 1 | 0 | 5.089628  | -1.940840 | -0.180761 |
| 56 | 1 | 0 | 4.807863  | -3.117815 | 1.978664  |
| 57 | 1 | 0 | 3.909217  | -1.598428 | 2.043084  |
| 58 | 1 | 0 | 3.053136  | -3.129696 | 1.809569  |
| 59 | 1 | 0 | -3.373818 | -1.950102 | -1.664027 |
| 60 | 1 | 0 | -4.895679 | -1.444113 | -0.954033 |
| 61 | 1 | 0 | -4.209272 | -2.488068 | 2.052022  |
| 62 | 1 | 0 | -5.091492 | -1.029849 | 1.548098  |
| 63 | 1 | 0 | -3.625737 | -0.895712 | 2.535947  |
| 64 | 1 | 0 | -3.531873 | -4.154246 | -0.384306 |
| 65 | 1 | 0 | -5.104722 | -3.643532 | 0.244124  |
| 66 | 1 | 0 | -4.882968 | -3.884450 | -1.490104 |

### 1-3

Standard orientation:

| Center<br>Number | Atomic<br>Number | Atomic<br>Type | Coordinates (Angstroms) |           |           |
|------------------|------------------|----------------|-------------------------|-----------|-----------|
|                  |                  |                | X                       | Y         | Z         |
| 1                | 6                | 0              | -1.770092               | 0.544063  | -0.396359 |
| 2                | 6                | 0              | -0.786362               | -1.853038 | -0.302624 |
| 3                | 6                | 0              | -3.249071               | -1.390817 | 0.443068  |
| 4                | 6                | 0              | -1.923760               | -2.145925 | 0.662179  |
| 5                | 6                | 0              | -2.946409               | 0.053152  | 0.067243  |
| 6                | 6                | 0              | -0.575137               | -0.335960 | -0.551847 |
| 7                | 6                | 0              | 0.557597                | -0.380083 | 0.556879  |
| 8                | 6                | 0              | 0.605949                | -1.914938 | 0.370315  |
| 9                | 6                | 0              | 1.695456                | -2.428663 | -0.554281 |
| 10               | 6                | 0              | 3.018054                | -1.647372 | -0.716930 |
| 11               | 6                | 0              | 2.916725                | -0.231715 | -0.182731 |
| 12               | 6                | 0              | 1.837399                | 0.362633  | 0.380178  |
| 13               | 8                | 0              | -4.042672               | 0.843090  | 0.191717  |
| 14               | 6                | 0              | -4.012683               | 2.173830  | -0.134697 |
| 15               | 6                | 0              | -2.891060               | 2.755198  | -0.633611 |
| 16               | 6                | 0              | -1.685536               | 1.940275  | -0.828167 |
| 17               | 6                | 0              | 1.944054                | 1.730537  | 0.894095  |
| 18               | 6                | 0              | 3.223855                | 2.411928  | 0.665606  |
| 19               | 6                | 0              | 4.237681                | 1.736910  | 0.063913  |
| 20               | 8                | 0              | 4.091243                | 0.435024  | -0.336051 |

|    |   |   |           |           |           |
|----|---|---|-----------|-----------|-----------|
| 21 | 8 | 0 | -0.656253 | 2.404607  | -1.345022 |
| 22 | 8 | 0 | 1.009764  | 2.276941  | 1.502578  |
| 23 | 6 | 0 | -2.785472 | 4.201584  | -1.031843 |
| 24 | 6 | 0 | -5.349336 | 2.786281  | 0.141626  |
| 25 | 6 | 0 | 3.315409  | 3.833872  | 1.147595  |
| 26 | 6 | 0 | 5.619581  | 2.208754  | -0.262132 |
| 27 | 8 | 0 | 1.548212  | -3.485458 | -1.145591 |
| 28 | 8 | 0 | -1.802638 | -2.966421 | 1.555198  |
| 29 | 1 | 0 | -0.113524 | -0.151150 | -1.526262 |
| 30 | 1 | 0 | 0.118585  | -0.111286 | 1.521413  |
| 31 | 1 | 0 | -0.920379 | -2.478760 | -1.192416 |
| 32 | 1 | 0 | 0.642136  | -2.515100 | 1.286805  |
| 33 | 6 | 0 | -4.101580 | -1.454164 | 1.725195  |
| 34 | 6 | 0 | -4.001044 | -2.049323 | -0.771069 |
| 35 | 6 | 0 | -4.398833 | -3.515784 | -0.580719 |
| 36 | 6 | 0 | 4.139439  | -2.439100 | 0.035456  |
| 37 | 6 | 0 | 3.371347  | -1.606794 | -2.226199 |
| 38 | 6 | 0 | 3.960595  | -2.574360 | 1.549973  |
| 39 | 1 | 0 | -1.964718 | 4.680471  | -0.487855 |
| 40 | 1 | 0 | -3.698715 | 4.765752  | -0.845126 |
| 41 | 1 | 0 | -2.539671 | 4.281943  | -2.095925 |
| 42 | 1 | 0 | -6.126749 | 2.256958  | -0.419116 |
| 43 | 1 | 0 | -5.592034 | 2.692747  | 1.205505  |
| 44 | 1 | 0 | -5.379930 | 3.839257  | -0.130697 |
| 45 | 1 | 0 | 3.181011  | 3.875016  | 2.233822  |
| 46 | 1 | 0 | 4.263789  | 4.309606  | 0.899880  |
| 47 | 1 | 0 | 2.505226  | 4.427961  | 0.712786  |
| 48 | 1 | 0 | 6.359499  | 1.562512  | 0.221539  |
| 49 | 1 | 0 | 5.787987  | 3.233434  | 0.062593  |
| 50 | 1 | 0 | 5.790854  | 2.150901  | -1.342330 |
| 51 | 1 | 0 | -4.209180 | -2.488032 | 2.052113  |
| 52 | 1 | 0 | -5.091403 | -1.029800 | 1.548233  |
| 53 | 1 | 0 | -3.625588 | -0.895680 | 2.535996  |
| 54 | 1 | 0 | -4.895730 | -1.444081 | -0.953915 |
| 55 | 1 | 0 | -3.373920 | -1.950126 | -1.663980 |
| 56 | 1 | 0 | -4.883126 | -3.884418 | -1.489950 |
| 57 | 1 | 0 | -3.531979 | -4.154248 | -0.384224 |
| 58 | 1 | 0 | -5.104777 | -3.643473 | 0.244287  |
| 59 | 1 | 0 | 5.089626  | -1.940898 | -0.180731 |
| 60 | 1 | 0 | 4.185161  | -3.431123 | -0.425377 |
| 61 | 1 | 0 | 3.418092  | -2.625198 | -2.615038 |
| 62 | 1 | 0 | 4.339039  | -1.122755 | -2.372194 |
| 63 | 1 | 0 | 2.618510  | -1.052771 | -2.794566 |
| 64 | 1 | 0 | 3.909183  | -1.598377 | 2.043081  |
| 65 | 1 | 0 | 3.053077  | -3.129638 | 1.809608  |
| 66 | 1 | 0 | 4.807802  | -3.117784 | 1.978722  |

---

## References

- [1] Frisch, M. J.; Trucks, G. W.; Schlegel, H. B.; Scuseria, G. E.; Robb, M. A.; Cheeseman, J. R.; Scalmani, G.; Barone, V.; Mennucci, B.; Petersson, G. A.; Nakatsuji, H.; Caricato, M.; Li, X.; Hratchian, H. P.; Izmaylov, A. F.; Bloino, J.; Zheng, G.; Sonnenberg, J. L.; Hada, M.; Ehara, M.; Toyota, K.; Fukuda, R.; Hasegawa, J.; Ishida, M.; Nakajima, T.; Honda, Y.; Kitao, O.; Nakai, H.; Vreven, T.; Montgomery, J. A., Jr.; Peralta, J. E.; Ogliaro, F.; Bearpark, M.; Heyd, J. J.; Brothers, E.; Kudin, K. N.; Staroverov, V. N.; Kobayashi, R.; Normand, J.; Raghavachari, K.; Rendell, A.; Burant, J. C.; Iyengar, S. S.; Tomasi, J.; Cossi, M.; Rega, N.; Millam, J. M.; Klene, M.; Knox, J. E.; Cross, J. B.; Bakken, V.; Adamo, C.; Jaramillo, J.; Gomperts, R.; Stratmann, R. E.; Yazyev, O.; Austin, A. J.; Cammi, R.; Pomelli, C.; Ochterski, J. W.; Martin, R. L.; Morokuma, K.; Zakrzewski, V. G.; Voth, G. A.; Salvador, P.; Dannenberg, J. J.; Dapprich, S.; Daniels, A. D.; Farkas, O.; Foresman, J. B.; Ortiz, J. V.; Cioslowski, J.; Fox, D. J. Gaussian 09, Revision C1; Gaussian, Inc.: Wallingford, CT, 2010.
- [2] Bruhn, T.; Hemberger, Y.; Schaumlöffel, A.; Bringmann, G. *Spec Dis*, version 1.51, University of Würzburg, Germany, 2010.
- [3] Bruhn, T.; Schaumlöffel, A.; Hemberger, Y.; Bringmann, G. Quantifying the Comparison of Calculated and Experimental Electronic Circular Dichroism Spectra, *Chirality* 2013, 25, 243–249.

**Table S4.** 2D Structures of **1**

| label    | structure |
|----------|-----------|
| <b>1</b> |           |

| label | conformer                                                                            | Boltzmann weighting factors |
|-------|--------------------------------------------------------------------------------------|-----------------------------|
| 1-1   | 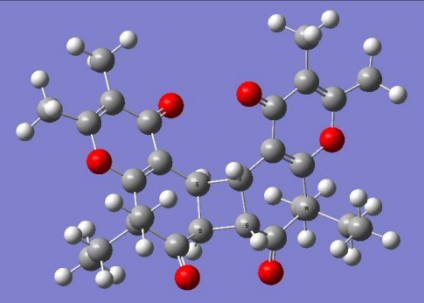   | 100.0                       |
| 1-2   |   | 0                           |
| 1-3   |  | 0                           |

**Figure S9.** B3LYP/6-31 G\* optimized lowest energy 3D conformers of **1**.

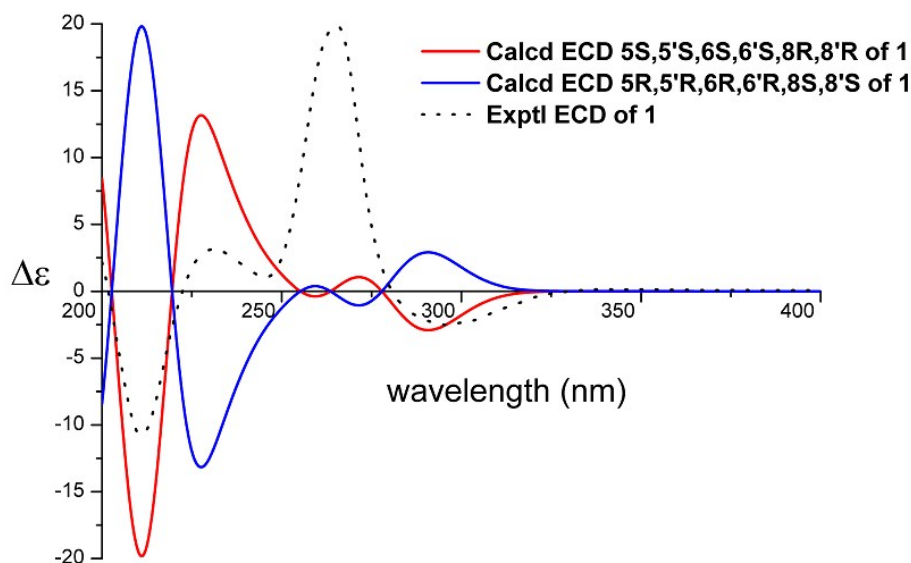

**Figure S10.** Experimental and calculated ECD spectra of **1**

#### X-ray Crystallographic Analysis of lecanicillone A (**1**)

Crystal data of **1**:  $C_{28}H_{32}O_6$ ,  $M = 464.54$ ; monoclinic system, space group  $P2(1)$ ,  $a = 12.0422(2)$  Å,  $b = 6.75793(12)$  Å,  $c = 15.1547(3)$  Å,  $V = 1199.49(4)$  Å<sup>3</sup>,  $Z = 2$ ,  $d = 1.286$  g/cm<sup>3</sup>,  $F(000) = 496$ . A crystal of dimensions  $0.35 \times 0.35 \times 0.30$  mm<sup>3</sup> was used for measurement with monochromator graphite,  $\mu(\text{Cu K}\alpha) = 0.727$  mm<sup>-1</sup>. A total of 8390 reflections were collected in the range  $6 \leq 2\theta \leq 141.92$ , of which 4358 unique reflections with  $I > 2\sigma(I)$  were collected for the analysis. The structure was refined by full-matrix least squares on  $F^2$  using SHELXL-97 package software. The final reliability factors are:  $R = 0.0345$ ,  $wR_2 = 0.0897$ , and the goodness of fit on  $F^2$  was equal to 0.992. Crystallographic data for the structure reported in this paper have been deposited at the Cambridge Crystallographic Data Centre under the reference number CCDC 1037052. Copies of the data can be obtained, free of charge, on application to CCDC, 12 Union Road, Cambridge CB2 1EZ, UK, (fax: +44-(0)1223-336033 or e-mail: deposit@ccdc.cam.ac.Uk).

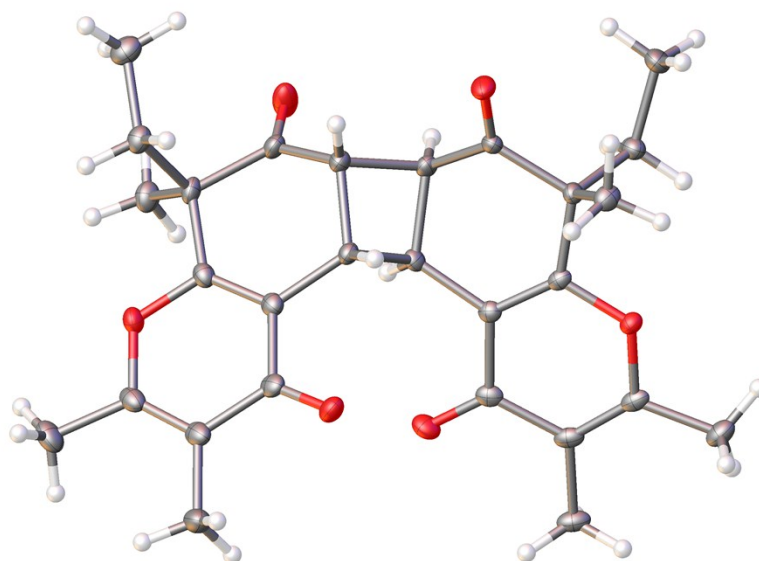

**Figure S11.** X-ray structure of lecanicillone A (1)

## 6. The spectra of lecanicillone B (2)

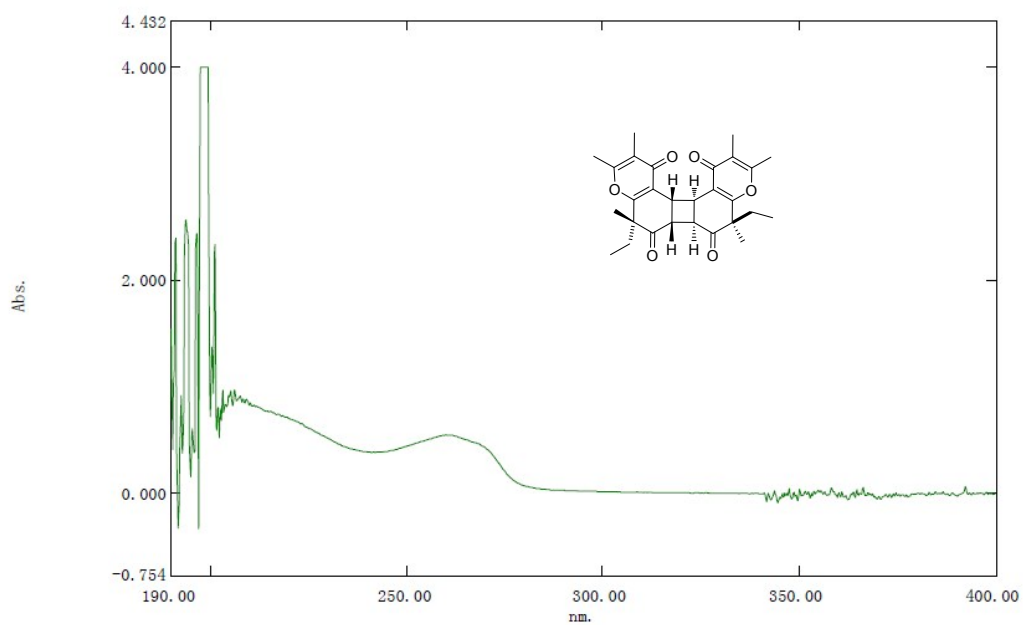

**Figure S12.** The UV spectrum of compound 2

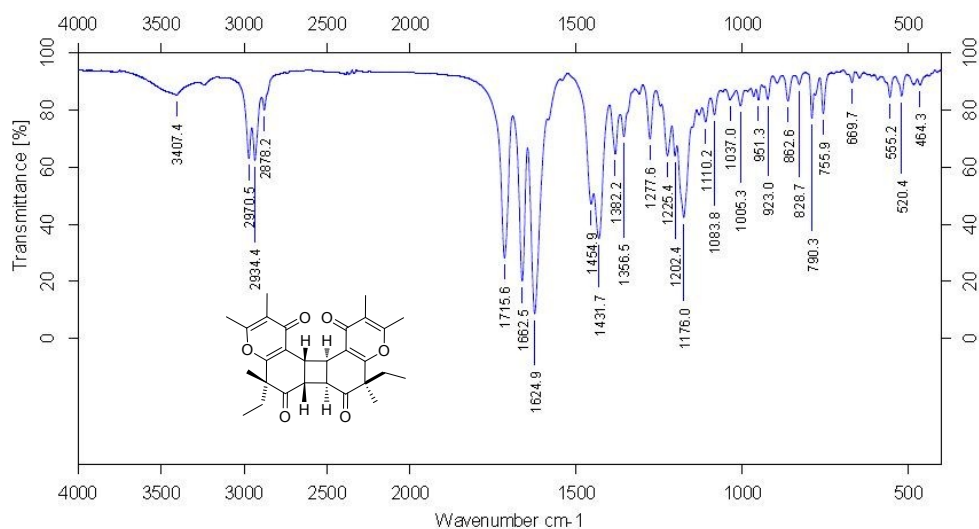

|                         |                                     |                                |
|-------------------------|-------------------------------------|--------------------------------|
| Sample : WZY-5          | Frequency Range : 3999.64 - 400.157 | Measured on : 2014-3-13        |
| Technique : Sample form | Resolution : 2                      | Instrument : EQUINOX55         |
| Customer : Default      | Zerofilling : 2                     | Acquisition : Double Sided,For |
|                         |                                     | Sample Scans : 16              |

Figure S13. The IR spectrum of compound 2

### Mass Spectrum Molecular Formula Report

#### Analysis Info

Analysis Name D:\Data\20131111ceyang\WZY-5\_1-b,6\_01\_2139.d  
 Method 20131026\_ceyang.m  
 Sample Name WZY-5  
 Comment

Acquisition Date 11/11/2013 3:51:06 PM

Operator Bruker Customer  
 Instrument / Ser# micrOTOF-Q 125

#### Acquisition Parameter

|             |          |                       |           |                  |           |
|-------------|----------|-----------------------|-----------|------------------|-----------|
| Source Type | ESI      | Ion Polarity          | Positive  | Set Nebulizer    | 1.2 Bar   |
| Focus       | Active   | Set Capillary         | 4500 V    | Set Dry Heater   | 180 °C    |
| Scan Begin  | 50 m/z   | Set End Plate Offset  | -500 V    | Set Dry Gas      | 8.0 l/min |
| Scan End    | 1000 m/z | Set Collision Cell RF | 300.0 Vpp | Set Divert Valve | Source    |

#### Generate Molecular Formula Parameter

|                  |           |                        |       |         |   |
|------------------|-----------|------------------------|-------|---------|---|
| Formula, min.    | C28H32O6H | Tolerance              | 5 ppm | Charge  | 1 |
| Formula, max.    |           | Minimum                | 0     | Maximum | 0 |
| Measured m/z     | 465.226   | Electron Configuration | both  |         |   |
| Check Valence    | no        | Minimum                | 0     | Maximum | 3 |
| Nitrogen Rule    | no        |                        |       |         |   |
| Filter H/C Ratio | no        |                        |       |         |   |
| Estimate Carbon  | yes       |                        |       |         |   |

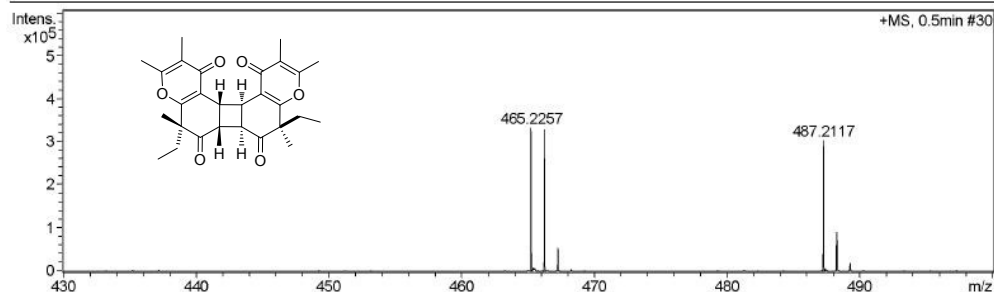

| Sum Formula   | Sigma | m/z      | Err [ppm] | Mean Err [ppm] | Err [mDa] | rtb   | N Rule | e <sup>-</sup> |
|---------------|-------|----------|-----------|----------------|-----------|-------|--------|----------------|
| C 28 H 33 O 6 | 0.343 | 465.2272 | 3.15      | -0.10          | 1.46      | 12.50 | ok     | even           |

Figure S14. The HR-ESI-MS spectrum of compound 2

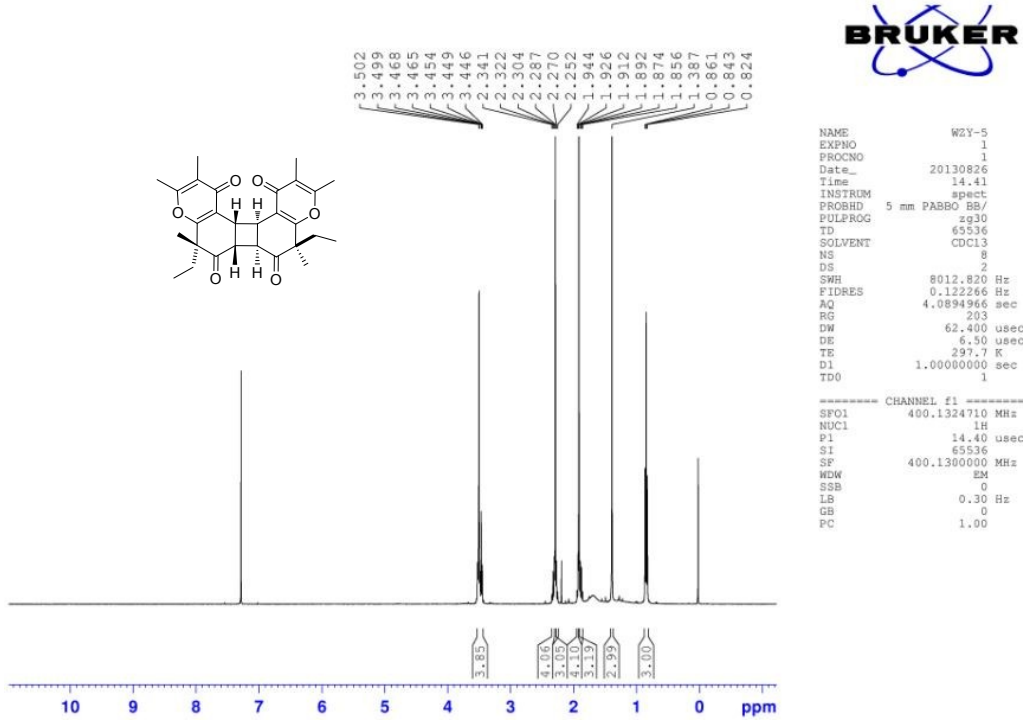

Figure S15. The <sup>1</sup>H-NMR spectrum of compound 2

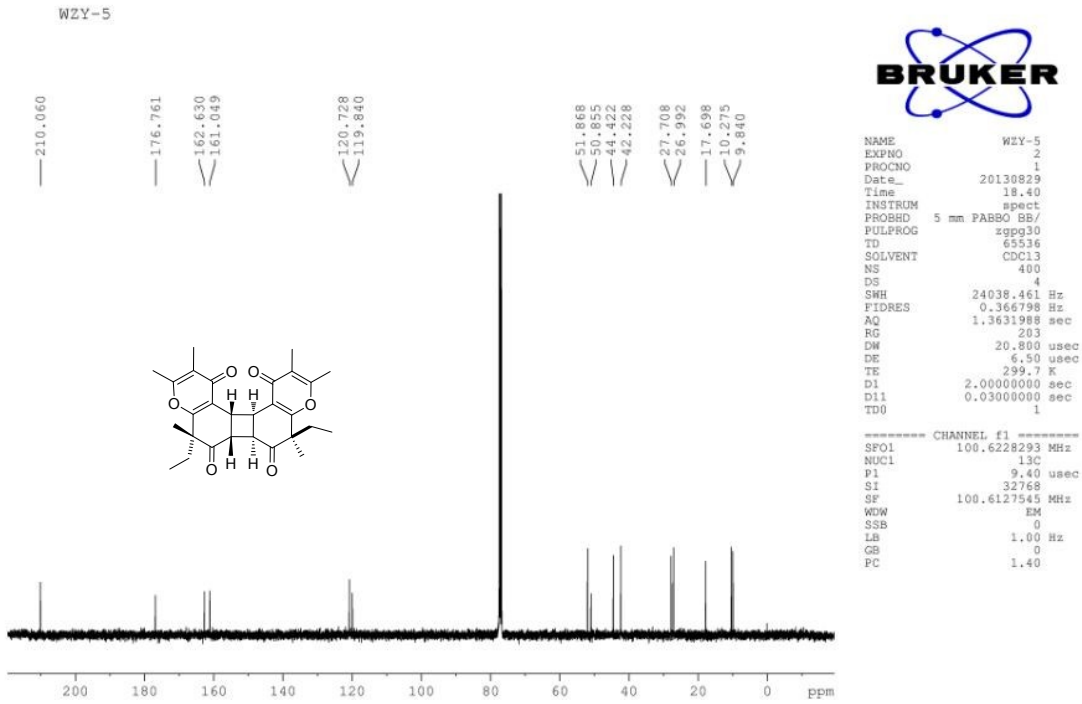



Figure S16. The  $^{13}\text{C}$ -NMR spectrum of compound 2

AV-600-HSQC  
Sample:

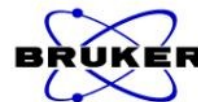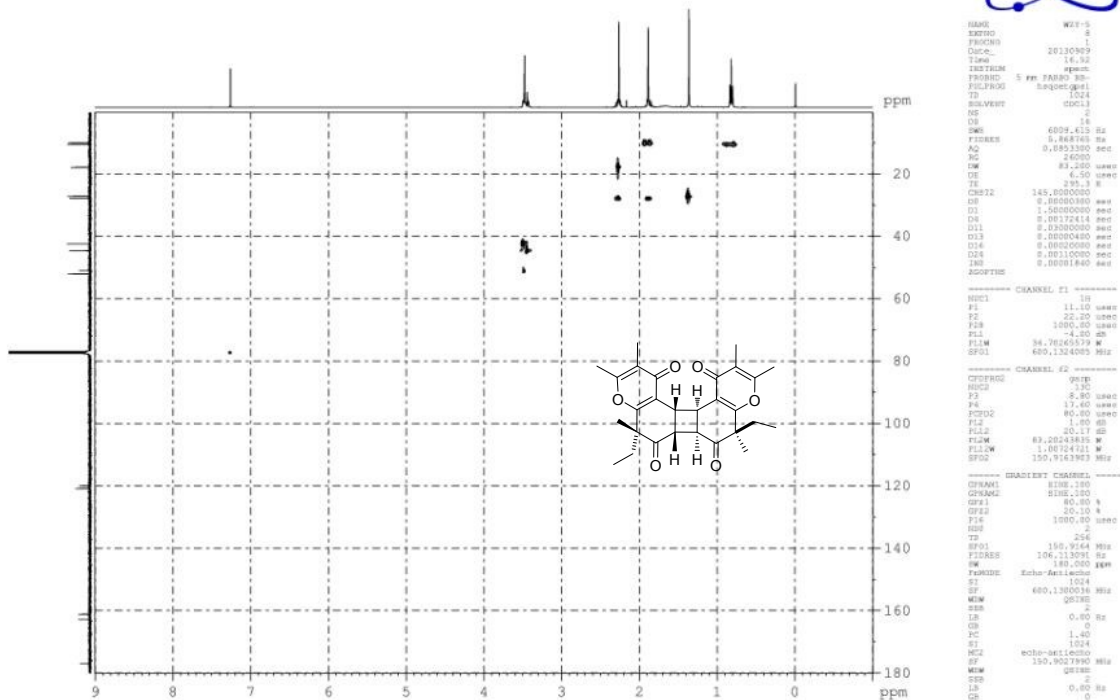

Figure S17. The HSQC spectrum of compound 2

AV-600-HMBC  
Sample:

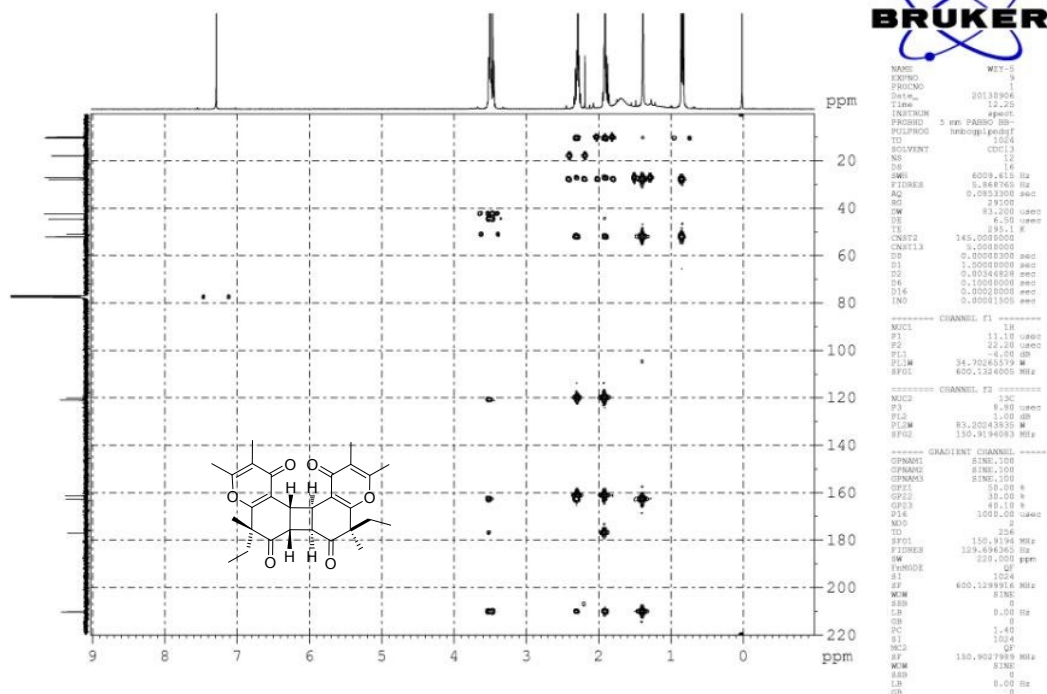

Figure S18. The HMBC spectrum of compound 2

AV-600-NOESY  
Sample:

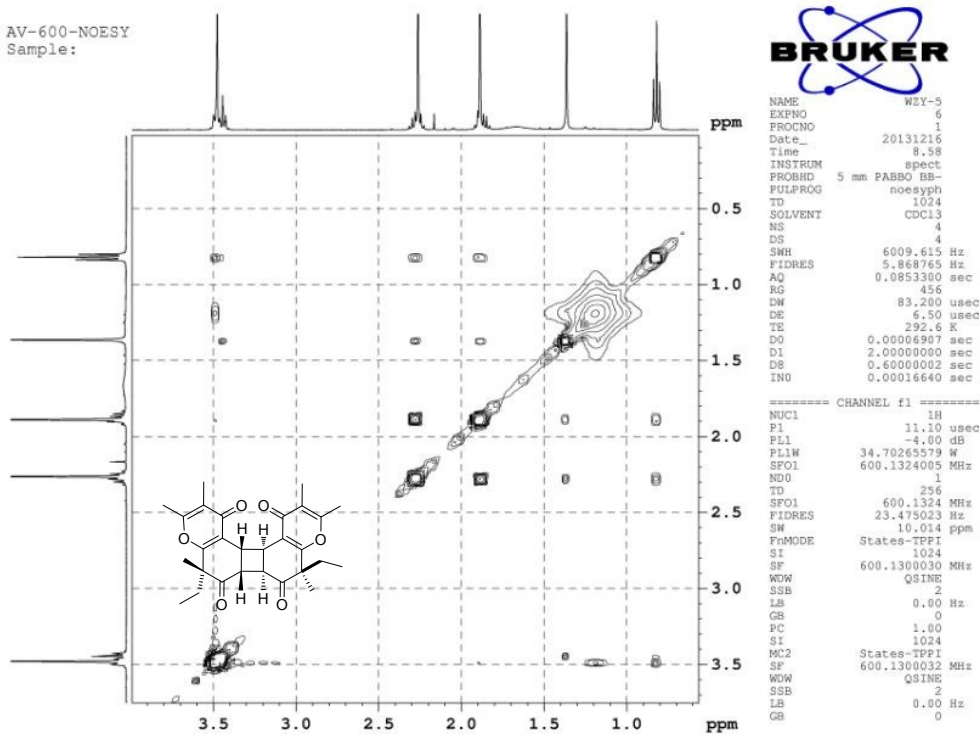

Figure S19. The NOESY spectrum of compound 2

## Computational details for ECD of compound **2**

### Computational method

The Spartan 14.0 (Wavefunction Inc., Irvine, CA, USA) searches using molecular mechanics MMFF were performed for **compound 2**, which gave 11 conformers, The low-energy conformers of **compound 2** accounting for more than 5% Boltzmann distribution were further optimized successively in the gas phase by semi-empirical method and the Hartree-Fork (HF) method at the 6-31G (d) level in Gaussian 09 program package,<sup>[1]</sup> which was reoptimized and analysed frequency, orderly, using the density functional theory (DFT) at the B3LYP/6-31G (d, p) level and the same way in the methanol, resulted in no imaginary frequencies. Solvent effects were taken into consideration by using the conductor polarizable continuum model (CPCM). The conformers of **compound 2** were calculated electronic circular dichroism (ECD) by the time-dependent density functional theory (TD-DFT) method at the B3LYP/6-31G (d, p) level with the CPCM model in methanol solution. The overall calculated ECD curves of the **compound 2** were generated severally by Boltzmann weighting of their selected low-energy conformers using SpecDis 1.62 <sup>[2]</sup> with  $\sigma = 0.2\text{eV}$  at 28 nm shift.

**Table S5.** Energy analysis of compound **2**

| Label      | MMFF            |                 |
|------------|-----------------|-----------------|
|            | rel. E(Kal/mol) | Boltzmann Dist. |
| <b>2-1</b> | 0.00            | 0.986           |
| <b>2-2</b> | 13.89           | 0.004           |
| <b>2-3</b> | 13.89           | 0.004           |
| <b>2-4</b> | 14.13           | 0.003           |

**Table S6.** Computational details for ECD of compound **2**

### **2-1**

Standard orientation:

| Center<br>Number | Atomic<br>Number | Atomic<br>Type | Coordinates (Angstroms) |   |   |
|------------------|------------------|----------------|-------------------------|---|---|
|                  |                  |                | X                       | Y | Z |

|    |   |   |           |           |           |
|----|---|---|-----------|-----------|-----------|
| 1  | 6 | 0 | -0.993517 | 2.978401  | 2.437522  |
| 2  | 6 | 0 | -0.550842 | 4.099764  | 1.811667  |
| 3  | 8 | 0 | -0.166691 | 4.079040  | 0.496327  |
| 4  | 6 | 0 | -0.175327 | 2.932713  | -0.232177 |
| 5  | 6 | 0 | -0.572108 | 1.755446  | 0.308907  |
| 6  | 6 | 0 | -1.060562 | 1.717340  | 1.688989  |
| 7  | 6 | 0 | 0.250802  | 3.188174  | -1.667929 |
| 8  | 6 | 0 | 0.433805  | 1.864664  | -2.439661 |
| 9  | 6 | 0 | -0.401920 | 0.661444  | -2.035295 |
| 10 | 6 | 0 | -0.607808 | 0.508126  | -0.507508 |
| 11 | 6 | 0 | -0.886944 | 3.966798  | -2.395452 |
| 12 | 6 | 0 | 2.759869  | 3.412544  | -1.007931 |
| 13 | 6 | 0 | 1.556821  | 4.025435  | -1.730809 |
| 14 | 6 | 0 | 0.607808  | -0.508126 | -0.507508 |
| 15 | 6 | 0 | 0.401920  | -0.661444 | -2.035295 |
| 16 | 6 | 0 | -0.433805 | -1.864664 | -2.439661 |
| 17 | 6 | 0 | -0.250802 | -3.188174 | -1.667929 |
| 18 | 6 | 0 | 0.175327  | -2.932713 | -0.232177 |
| 19 | 6 | 0 | 0.572108  | -1.755446 | 0.308907  |
| 20 | 8 | 0 | 0.166691  | -4.079040 | 0.496327  |
| 21 | 6 | 0 | 0.550842  | -4.099764 | 1.811667  |
| 22 | 6 | 0 | 0.993517  | -2.978401 | 2.437522  |
| 23 | 6 | 0 | 1.060562  | -1.717340 | 1.688989  |
| 24 | 8 | 0 | 1.190591  | 1.805011  | -3.393583 |
| 25 | 8 | 0 | -1.522405 | 0.680117  | 2.192071  |
| 26 | 8 | 0 | -1.190591 | -1.805011 | -3.393583 |
| 27 | 6 | 0 | -1.556821 | -4.025435 | -1.730809 |
| 28 | 6 | 0 | 0.886944  | -3.966798 | -2.395452 |
| 29 | 8 | 0 | 1.522405  | -0.680117 | 2.192071  |
| 30 | 6 | 0 | -1.452541 | 2.925119  | 3.868685  |
| 31 | 6 | 0 | -0.401920 | 5.486062  | 2.353883  |
| 32 | 6 | 0 | 1.452541  | -2.925119 | 3.868685  |
| 33 | 1 | 0 | -1.527649 | -0.039513 | -0.282696 |
| 34 | 1 | 0 | 1.527649  | 0.039513  | -0.282696 |
| 35 | 1 | 0 | 1.308075  | -0.660197 | -2.652153 |
| 36 | 1 | 0 | -1.308075 | 0.660197  | -2.652153 |
| 37 | 6 | 0 | 0.401920  | -5.486062 | 2.353883  |
| 38 | 6 | 0 | -2.759869 | -3.412544 | -1.007931 |
| 39 | 1 | 0 | -1.822895 | 3.401202  | -2.403450 |
| 40 | 1 | 0 | -1.065146 | 4.917322  | -1.886436 |
| 41 | 1 | 0 | -0.592056 | 4.171600  | -3.428047 |
| 42 | 1 | 0 | 2.567195  | 3.277107  | 0.061135  |
| 43 | 1 | 0 | 3.631619  | 4.066836  | -1.105246 |
| 44 | 1 | 0 | 3.028286  | 2.440012  | -1.431076 |
| 45 | 1 | 0 | 1.340041  | 5.014554  | -1.317129 |
| 46 | 1 | 0 | 1.795142  | 4.163790  | -2.788688 |
| 47 | 1 | 0 | -1.340041 | -5.014554 | -1.317129 |

|    |   |   |           |           |           |
|----|---|---|-----------|-----------|-----------|
| 48 | 1 | 0 | -1.795142 | -4.163790 | -2.788688 |
| 49 | 1 | 0 | 0.592056  | -4.171600 | -3.428047 |
| 50 | 1 | 0 | 1.065146  | -4.917322 | -1.886436 |
| 51 | 1 | 0 | 1.822895  | -3.401202 | -2.403450 |
| 52 | 1 | 0 | -0.856399 | 2.196334  | 4.427944  |
| 53 | 1 | 0 | -2.489757 | 2.577685  | 3.916162  |
| 54 | 1 | 0 | -1.386834 | 3.886706  | 4.376948  |
| 55 | 1 | 0 | -1.015484 | 6.183584  | 1.773982  |
| 56 | 1 | 0 | -0.696768 | 5.549583  | 3.399309  |
| 57 | 1 | 0 | 0.639265  | 5.813132  | 2.263565  |
| 58 | 1 | 0 | 2.489757  | -2.577685 | 3.916162  |
| 59 | 1 | 0 | 0.856399  | -2.196334 | 4.427944  |
| 60 | 1 | 0 | 1.386834  | -3.886706 | 4.376948  |
| 61 | 1 | 0 | 0.696768  | -5.549583 | 3.399309  |
| 62 | 1 | 0 | 1.015484  | -6.183584 | 1.773982  |
| 63 | 1 | 0 | -0.639265 | -5.813132 | 2.263565  |
| 64 | 1 | 0 | -3.631619 | -4.066836 | -1.105246 |
| 65 | 1 | 0 | -3.028286 | -2.440012 | -1.431076 |
| 66 | 1 | 0 | -2.567195 | -3.277107 | 0.061135  |

---

## References

- [1] Frisch, M. J.; Trucks, G. W.; Schlegel, H. B.; Scuseria, G. E.; Robb, M. A.; Cheeseman, J. R.; Scalmani, G.; Barone, V.; Mennucci, B.; Petersson, G. A.; Nakatsuji, H.; Caricato, M.; Li, X.; Hratchian, H. P.; Izmaylov, A. F.; Bloino, J.; Zheng, G.; Sonnenberg, J. L.; Hada, M.; Ehara, M.; Toyota, K.; Fukuda, R.; Hasegawa, J.; Ishida, M.; Nakajima, T.; Honda, Y.; Kitao, O.; Nakai, H.; Vreven, T.; Montgomery, J. A., Jr.; Peralta, J. E.; Ogliaro, F.; Bearpark, M.; Heyd, J. J.; Brothers, E.; Kudin, K. N.; Staroverov, V. N.; Kobayashi, R.; Normand, J.; Raghavachari, K.; Rendell, A.; Burant, J. C.; Iyengar, S. S.; Tomasi, J.; Cossi, M.; Rega, N.; Millam, J. M.; Klene, M.; Knox, J. E.; Cross, J. B.; Bakken, V.; Adamo, C.; Jaramillo, J.; Gomperts, R.; Stratmann, R. E.; Yazyev, O.; Austin, A. J.; Cammi, R.; Pomelli, C.; Ochterski, J. W.; Martin, R. L.; Morokuma, K.; Zakrzewski, V. G.; Voth, G. A.; Salvador, P.; Dannenberg, J. J.; Dapprich, S.; Daniels, A. D.; Farkas, O.; Foresman, J. B.; Ortiz, J. V.; Cioslowski, J.; Fox, D. J. Gaussian 09, Revision C1; Gaussian, Inc.: Wallingford, CT, 2010.
- [2] Bruhn, T.; Schaumlöffel, A.; Hemberger, Y.; Bringmann, G. Quantifying the Comparison of Calculated and Experimental Electronic Circular Dichroism Spectra, *Chirality* 2013, 25, 243–249.

**Table S7.** 2D Structure of **2**

| label | structure |
|-------|-----------|
| 2-1   |           |

| label | conformer | Boltzmann weighting factors |
|-------|-----------|-----------------------------|
| 2-1   |           | 100                         |

**Figure S20.** B3LYP/6-31 G\* optimized lowest energy 3D conformer of **2**

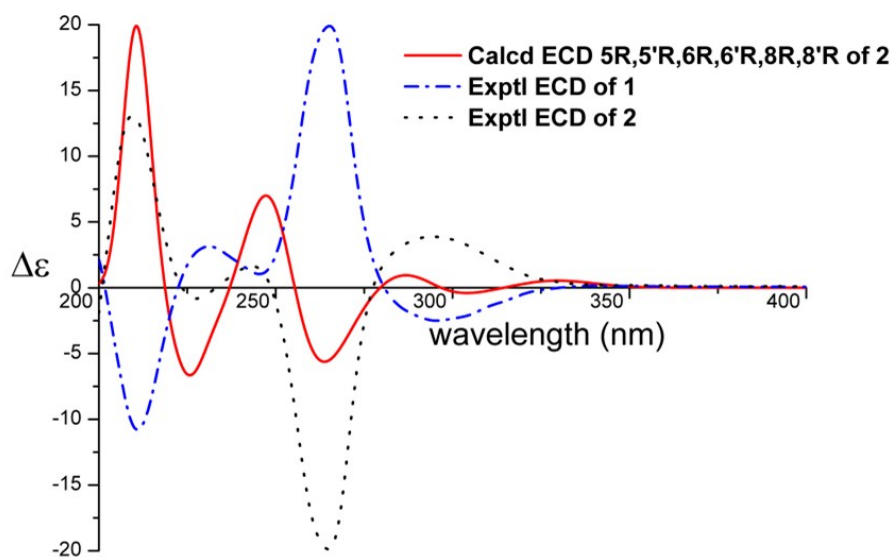

**Figure S21.** Experimental and suitable calculated ECD spectra of **2**

## 8. The spectra of lecanicillone C (3)

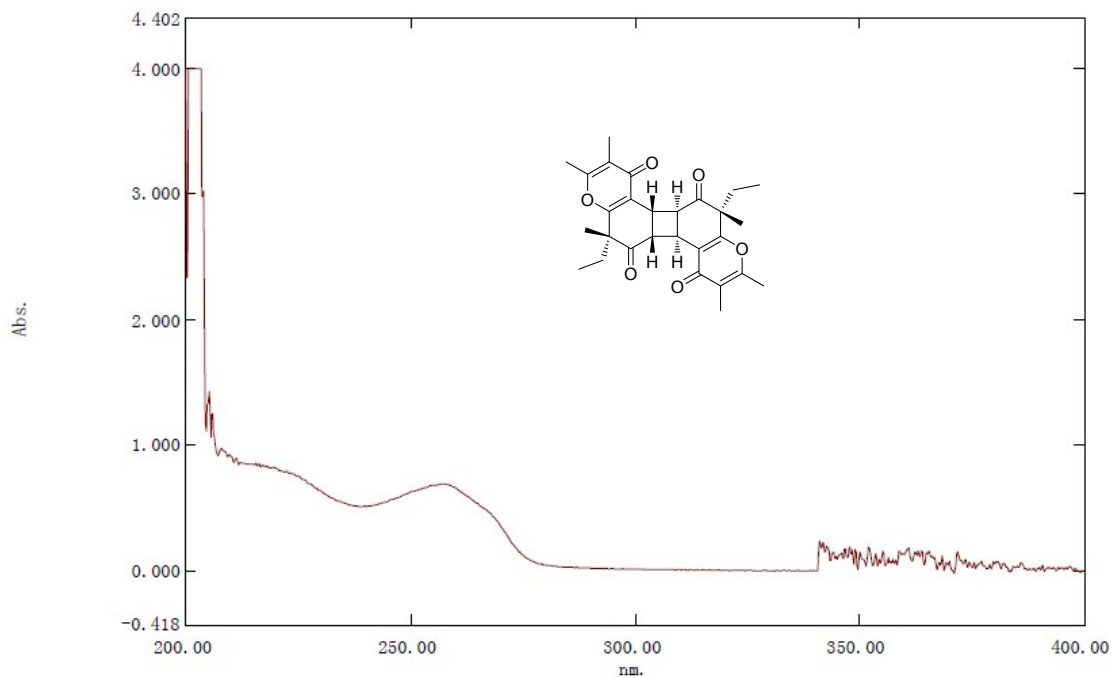

**Figure S22.** The UV spectrum of compound 3

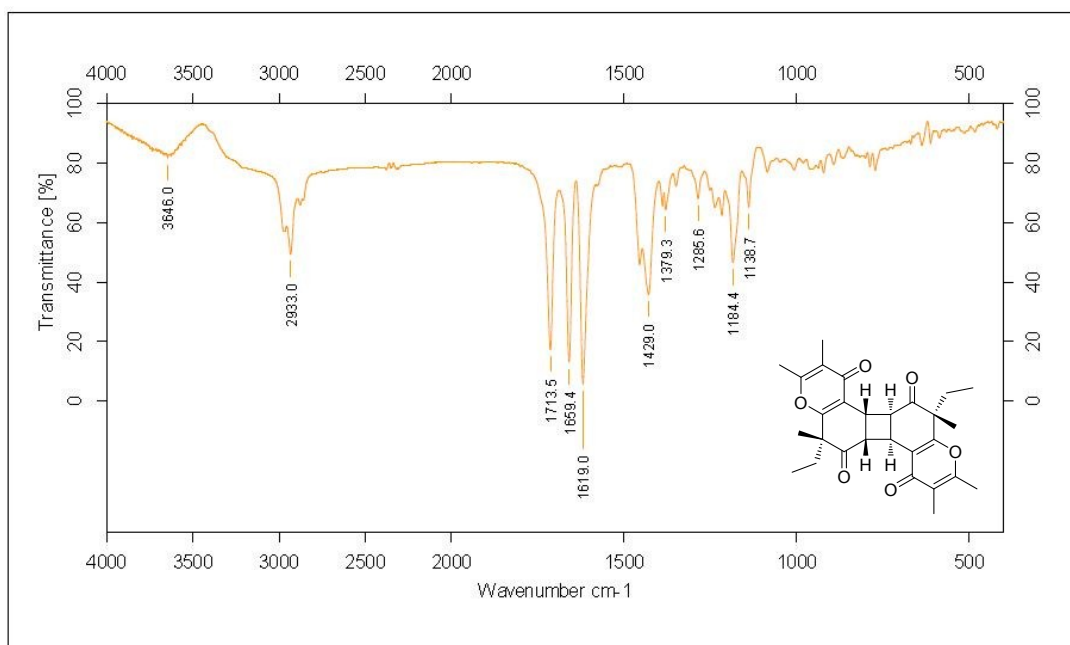

|                         |                 |                                     |  |                         |  |
|-------------------------|-----------------|-------------------------------------|--|-------------------------|--|
| Sample : WZY-4          |                 | Frequency Range : 3999.64 - 400.157 |  | Measured on : 2014-3-11 |  |
| Technique : Sample form | Resolution : 2  | Instrument : EQUINOX55              |  | Sample Scans : 16       |  |
| Customer : Default      | Zerofilling : 2 | Acquisition : Double Sided,Forv     |  |                         |  |

**Figure S23.** The IR spectrum of compound 3

## Mass Spectrum Molecular Formula Report

|                      |                                              |                   |                       |
|----------------------|----------------------------------------------|-------------------|-----------------------|
| <b>Analysis Info</b> |                                              | Acquisition Date  | 11/11/2013 3:46:54 PM |
| Analysis Name        | D:\Data\20131111ceyang\WZY-4_1-b,5_01_2138.d | Operator          | Bruker Customer       |
| Method               | 20131026_ceyang.m                            | Instrument / Ser# | microTOF-Q 125        |
| Sample Name          | WZY-4                                        |                   |                       |
| Comment              |                                              |                   |                       |

|                              |          |                       |           |                 |           |
|------------------------------|----------|-----------------------|-----------|-----------------|-----------|
| <b>Acquisition Parameter</b> |          |                       |           |                 |           |
| Source Type                  | ESI      | Ion Polarity          | Positive  | Set Nebulizer   | 1.2 Bar   |
| Focus                        | Active   | Set Capillary         | 4500 V    | Set Dry Heater  | 180 °C    |
| Scan Begin                   | 50 m/z   | Set End Plate Offset  | -500 V    | Set Dry Gas     | 8.0 l/min |
| Scan End                     | 1000 m/z | Set Collision Cell RF | 300.0 Vpp | Set Diver Valve | Source    |

|                                             |           |                        |       |         |   |
|---------------------------------------------|-----------|------------------------|-------|---------|---|
| <b>Generate Molecular Formula Parameter</b> |           |                        |       |         |   |
| Formula, min.                               | C28H32O6H |                        |       |         |   |
| Formula, max.                               |           |                        |       |         |   |
| Measured m/z                                | 465.226   | Tolerance              | 5 ppm | Charge  | 1 |
| Check Valence                               | no        | Minimum                | 0     | Maximum | 0 |
| Nitrogen Rule                               | no        | Electron Configuration | both  |         |   |
| Filter H/C Ratio                            | no        | Minimum                | 0     | Maximum | 3 |
| Estimate Carbon                             | yes       |                        |       |         |   |

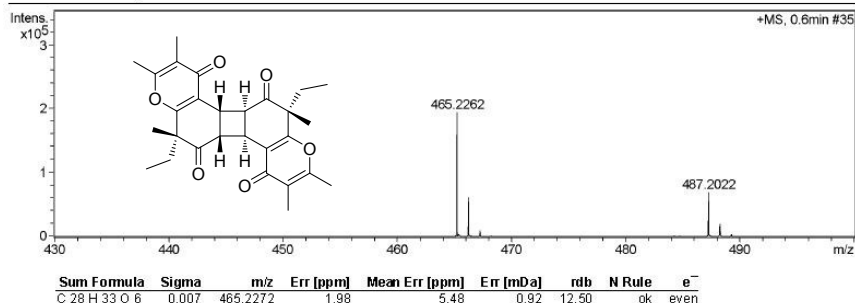

**Figure S24.** The HR-ESI-MS spectrum of compound 3

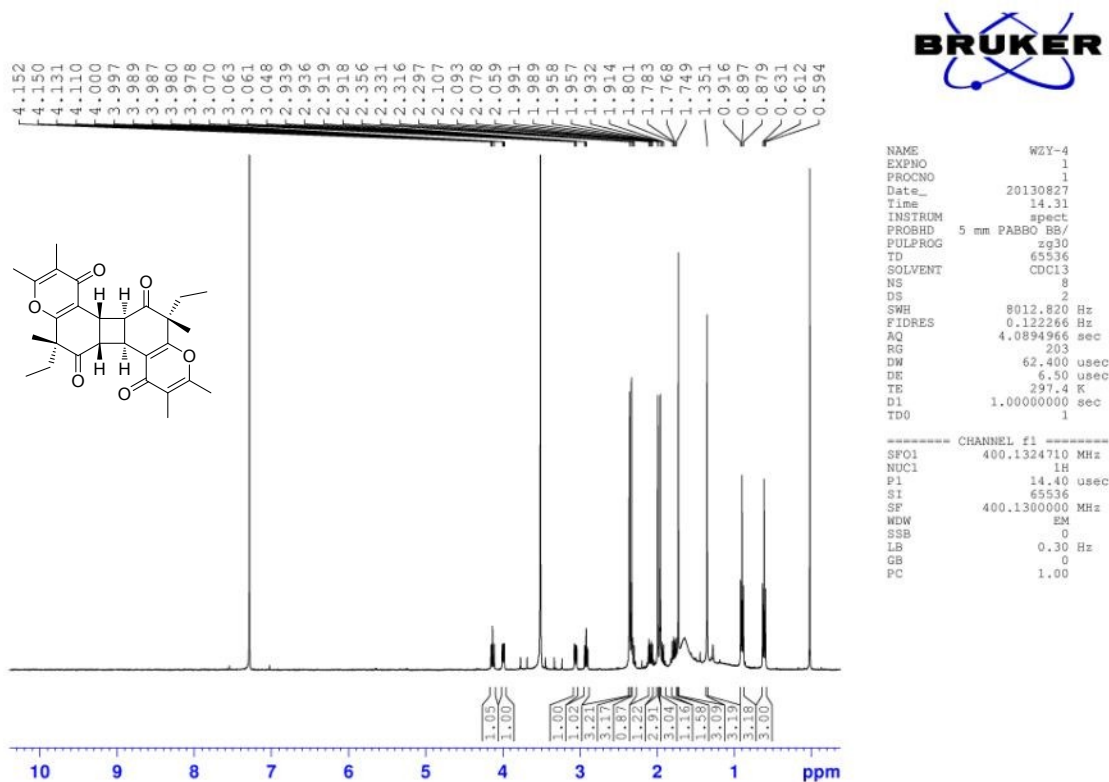

**Figure S25.** The <sup>1</sup>H-NMR spectrum of compound 3



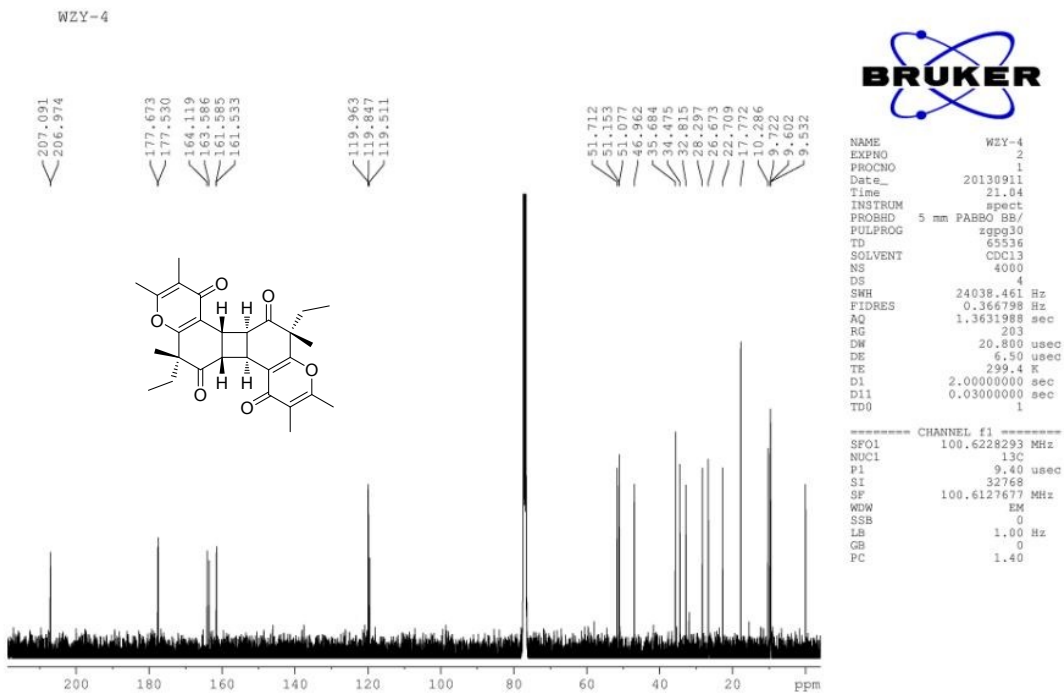

Figure S26. The  $^{13}\text{C}$ -NMR spectrum of compound 3

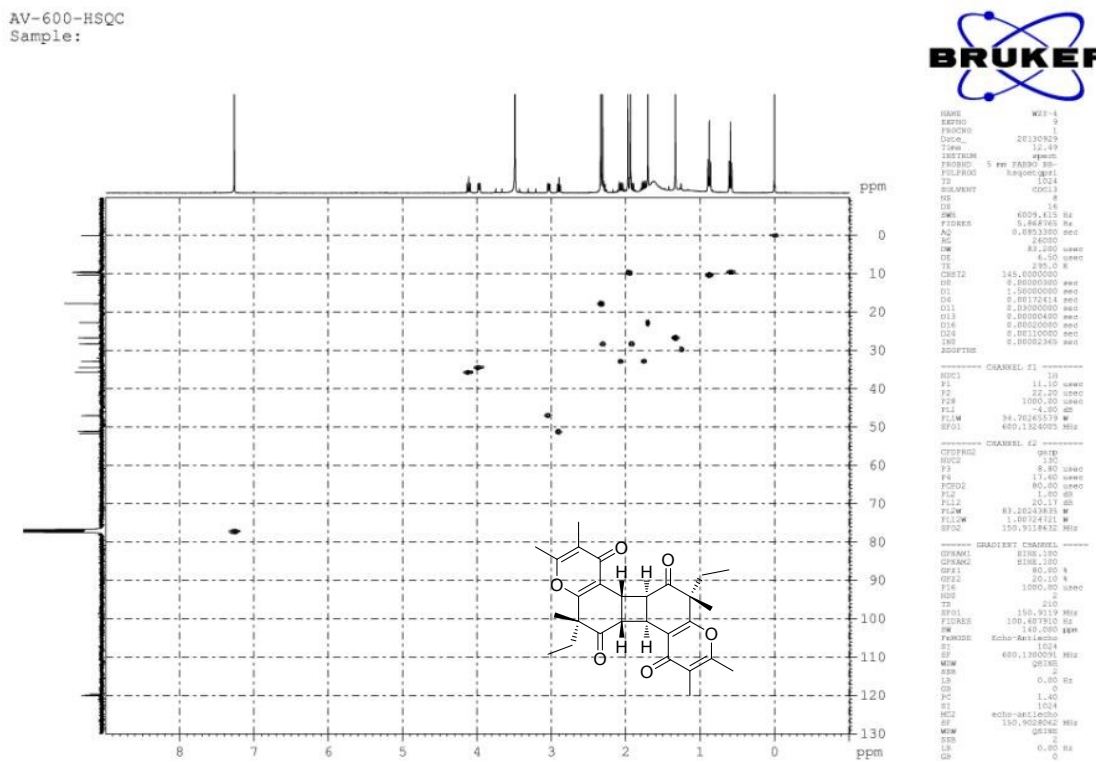

Figure S27. The HSQC spectrum of compound 3

AV-600-HMBC  
Sample:

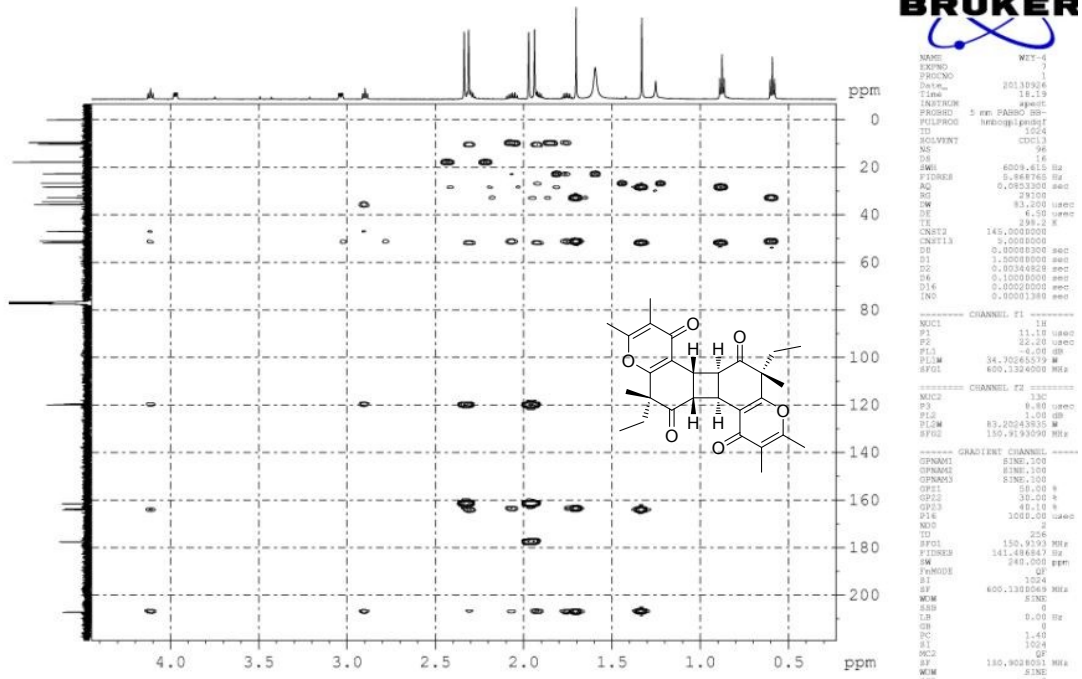

Figure S28. The HMBC spectrum of compound 3

AV-600-COSY  
Sample:

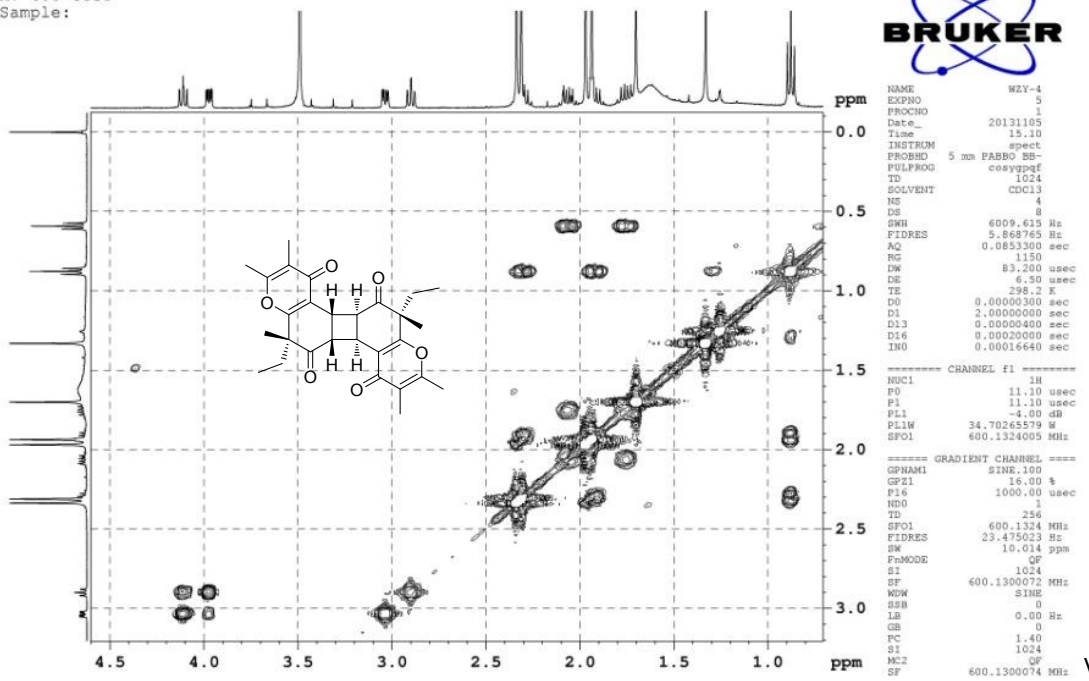

Figure S29. The  $^1\text{H}$ - $^1\text{H}$  COSY spectrum of compound 3

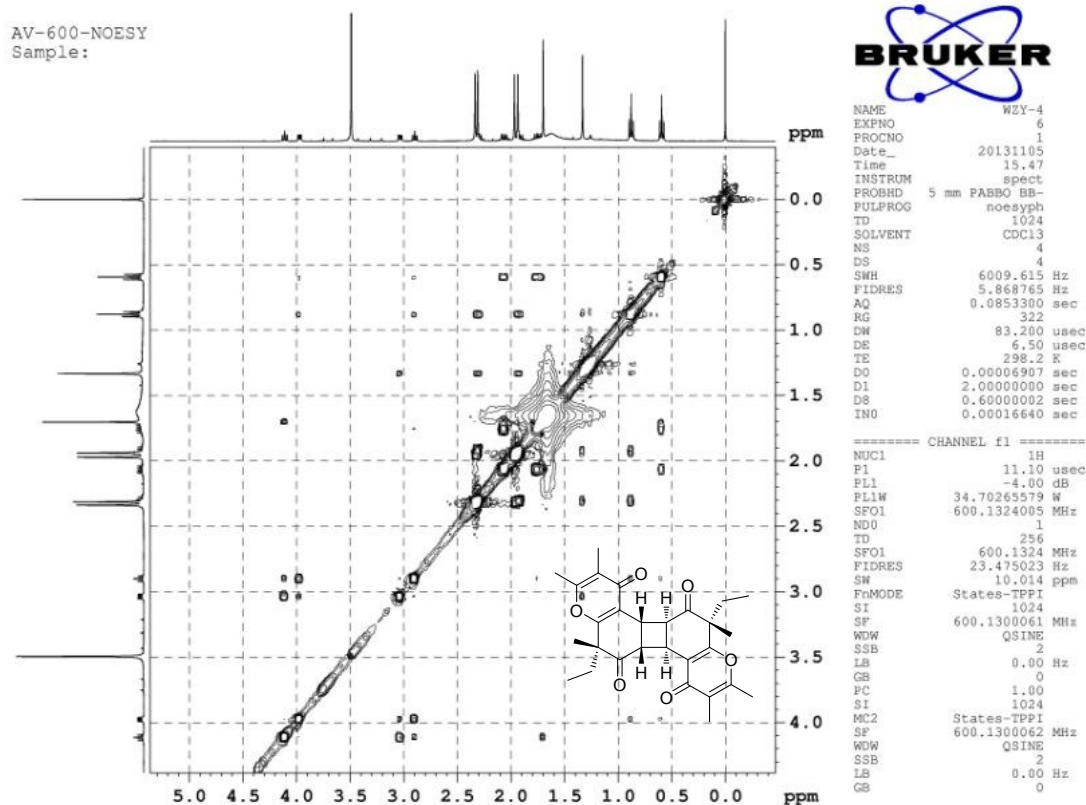

**Figure S30.** The NOESY spectrum of compound **3**

Computational details for ECD of compound **3**

### Computational methods

The Spartan 14.0 (Wavefunction Inc., Irvine, CA, USA) searches using molecular mechanics MMFF were performed for *5S,5'R,6R,6'S,8R,8'R* of **3** (**3a**) and *5R,5'S,6S,6'R,8R,8'R* of **3** (**3b**), which gave respectively 9 and 10 conformers. The low-energy conformers of **3a** and **3b** separately accounting for more than 7% Boltzmann distribution was further optimized successively in the gas phase by semi-empirical method and the Hartree-Fork (HF) method at the 6-31G (d) level in Gaussian 09 program package,<sup>[1]</sup> which was reoptimized and analysed frequency, orderly, using the density functional theory (DFT) at the B3LYP/6-31G (d, p) level and the same way in the methanol, resulted in no imaginary frequencies. Solvent effects were taken into consideration by using the conductor polarizable continuum model (CPCM). The conformers of **3a** and **3b** were calculated electronic circular dichroism (ECD) by the time-dependent density functional

theory (TD-DFT) method at the B3LYP/6-31G (d, p) level with the CPCM model in methanol solution. The overall calculated ECD curves of the **3a** and **3b** were generated severally by Boltzmann weighting of their selected low-energy conformers using SpecDis 1.62 [2] with  $\sigma = 0.3\text{eV}$  at 16nm shift, together with  $\sigma = 0.28\text{eV}$  at -5nm shift.

**Table S8.** Energy analysis of compounds **3a** and **3b**

| Label       | MMFF            |                 |
|-------------|-----------------|-----------------|
|             | rel. E(Kal/mol) | Boltzmann Dist. |
| <b>3a-1</b> | 0.00            | 0.671           |
| <b>3a-2</b> | 3.64            | 0.154           |
| <b>3b-1</b> | 0.00            | 0.970           |

**Table S9.** Computational details for ECD of compound **3a**

**3a-1**

Standard orientation:

| Center Number | Atomic Number | Atomic Type | Coordinates (Angstroms) |           |           |
|---------------|---------------|-------------|-------------------------|-----------|-----------|
|               |               |             | X                       | Y         | Z         |
| 1             | 6             | 0           | -6.099504               | -0.278183 | -1.366331 |
| 2             | 6             | 0           | -4.816780               | 0.236465  | -0.793955 |
| 3             | 6             | 0           | -2.331607               | 0.615805  | 0.411323  |
| 4             | 6             | 0           | -4.337351               | 1.507005  | -0.773622 |
| 5             | 6             | 0           | -3.038714               | 1.771629  | -0.145301 |
| 6             | 6             | 0           | -2.899293               | -0.613586 | 0.342974  |
| 7             | 6             | 0           | -5.051038               | 2.697494  | -1.352646 |
| 8             | 8             | 0           | -4.111454               | -0.798704 | -0.242674 |
| 9             | 8             | 0           | -2.561572               | 2.918399  | -0.088262 |
| 10            | 6             | 0           | -2.380579               | -1.906716 | 0.941539  |
| 11            | 6             | 0           | -1.001404               | 0.839685  | 1.072598  |
| 12            | 6             | 0           | -0.190397               | -0.468908 | 1.270509  |
| 13            | 6             | 0           | -0.904554               | -1.791636 | 1.378721  |
| 14            | 6             | 0           | 0.115414                | 1.327124  | 0.094795  |
| 15            | 6             | 0           | 0.578412                | -0.135281 | -0.077745 |
| 16            | 6             | 0           | 1.128476                | 2.246282  | 0.759306  |
| 17            | 6             | 0           | 2.643820                | 2.000171  | 0.575867  |
| 18            | 6             | 0           | 2.937514                | 0.596978  | 0.084100  |
| 19            | 6             | 0           | 2.044235                | -0.384858 | -0.190486 |
| 20            | 6             | 0           | 2.516539                | -1.687939 | -0.660193 |
| 21            | 8             | 0           | 4.272684                | 0.392285  | -0.048192 |

|    |   |   |           |           |           |
|----|---|---|-----------|-----------|-----------|
| 22 | 6 | 0 | 4.782404  | -0.811244 | -0.457849 |
| 23 | 6 | 0 | 3.969769  | -1.854969 | -0.767949 |
| 24 | 6 | 0 | 4.451265  | -3.201006 | -1.235011 |
| 25 | 6 | 0 | 6.275941  | -0.737087 | -0.491921 |
| 26 | 8 | 0 | 1.730687  | -2.603470 | -0.961028 |
| 27 | 8 | 0 | 0.757572  | 3.208757  | 1.409038  |
| 28 | 6 | 0 | 3.192132  | 3.065284  | -0.431752 |
| 29 | 6 | 0 | 2.620347  | 3.007677  | -1.850773 |
| 30 | 6 | 0 | 3.337134  | 2.217055  | 1.945695  |
| 31 | 1 | 0 | -1.117910 | 1.474699  | 1.955346  |
| 32 | 1 | 0 | -0.235374 | 1.836707  | -0.808164 |
| 33 | 1 | 0 | 0.505202  | -0.395620 | 2.110739  |
| 34 | 1 | 0 | 0.067906  | -0.611603 | -0.917051 |
| 35 | 8 | 0 | -0.339935 | -2.769460 | 1.841868  |
| 36 | 6 | 0 | -3.198471 | -2.205280 | 2.232724  |
| 37 | 6 | 0 | -2.538948 | -3.106489 | -0.036613 |
| 38 | 6 | 0 | -1.837467 | -2.951353 | -1.389057 |
| 39 | 1 | 0 | -6.697439 | 0.516798  | -1.807112 |
| 40 | 1 | 0 | -5.891979 | -1.028724 | -2.136304 |
| 41 | 1 | 0 | -6.689197 | -0.766491 | -0.583450 |
| 42 | 1 | 0 | -5.262141 | 3.430790  | -0.567059 |
| 43 | 1 | 0 | -5.989478 | 2.437628  | -1.841575 |
| 44 | 1 | 0 | -4.407670 | 3.201051  | -2.081333 |
| 45 | 1 | 0 | 4.113241  | -3.982215 | -0.546056 |
| 46 | 1 | 0 | 5.535686  | -3.262002 | -1.320320 |
| 47 | 1 | 0 | 4.012553  | -3.436886 | -2.209869 |
| 48 | 1 | 0 | 6.596885  | 0.046810  | -1.186031 |
| 49 | 1 | 0 | 6.659493  | -0.473646 | 0.499311  |
| 50 | 1 | 0 | 6.724437  | -1.679494 | -0.799080 |
| 51 | 1 | 0 | 4.279427  | 2.945172  | -0.468046 |
| 52 | 1 | 0 | 2.993024  | 4.046528  | 0.011161  |
| 53 | 1 | 0 | 2.791854  | 2.034165  | -2.321321 |
| 54 | 1 | 0 | 3.100569  | 3.766160  | -2.476081 |
| 55 | 1 | 0 | 1.543584  | 3.205482  | -1.870149 |
| 56 | 1 | 0 | 3.095093  | 3.213198  | 2.318637  |
| 57 | 1 | 0 | 4.419755  | 2.126622  | 1.838286  |
| 58 | 1 | 0 | 2.999934  | 1.480665  | 2.681022  |
| 59 | 1 | 0 | -2.842852 | -3.136677 | 2.678685  |
| 60 | 1 | 0 | -4.257789 | -2.309498 | 1.985427  |
| 61 | 1 | 0 | -3.093256 | -1.402612 | 2.968523  |
| 62 | 1 | 0 | -3.608794 | -3.277006 | -0.188055 |
| 63 | 1 | 0 | -2.144739 | -3.983080 | 0.485753  |
| 64 | 1 | 0 | -2.213020 | -2.083779 | -1.942218 |
| 65 | 1 | 0 | -2.020618 | -3.835686 | -2.007860 |
| 66 | 1 | 0 | -0.754006 | -2.844622 | -1.275437 |

---

3a-2

Standard orientation:

| Center<br>Number | Atomic<br>Number | Atomic<br>Type | Coordinates (Angstroms) |           |           |
|------------------|------------------|----------------|-------------------------|-----------|-----------|
|                  |                  |                | X                       | Y         | Z         |
| 1                | 6                | 0              | -6.092907               | -0.161602 | -1.376236 |
| 2                | 6                | 0              | -4.804674               | 0.296596  | -0.769132 |
| 3                | 6                | 0              | -2.314476               | 0.560500  | 0.452901  |
| 4                | 6                | 0              | -4.310609               | 1.557321  | -0.660126 |
| 5                | 6                | 0              | -3.004758               | 1.760316  | -0.024676 |
| 6                | 6                | 0              | -2.897567               | -0.653874 | 0.303784  |
| 7                | 6                | 0              | -5.010555               | 2.794144  | -1.152547 |
| 8                | 8                | 0              | -4.112071               | -0.783275 | -0.292744 |
| 9                | 8                | 0              | -2.506745               | 2.892787  | 0.104312  |
| 10               | 6                | 0              | -2.394927               | -1.988663 | 0.817744  |
| 11               | 6                | 0              | -0.977211               | 0.727355  | 1.113793  |
| 12               | 6                | 0              | -0.184188               | -0.601449 | 1.241707  |
| 13               | 6                | 0              | -0.926556               | -1.913589 | 1.291357  |
| 14               | 6                | 0              | 0.129587                | 1.248283  | 0.153547  |
| 15               | 6                | 0              | 0.591013                | -0.211218 | -0.087004 |
| 16               | 6                | 0              | 1.183049                | 2.096096  | 0.844775  |
| 17               | 6                | 0              | 2.621184                | 2.013571  | 0.292787  |
| 18               | 6                | 0              | 2.947523                | 0.558710  | -0.010705 |
| 19               | 6                | 0              | 2.060807                | -0.452461 | -0.191932 |
| 20               | 6                | 0              | 2.542446                | -1.783512 | -0.558165 |
| 21               | 8                | 0              | 4.281883                | 0.358144  | -0.139249 |
| 22               | 6                | 0              | 4.801124                | -0.871911 | -0.448346 |
| 23               | 6                | 0              | 3.996839                | -1.946015 | -0.660426 |
| 24               | 6                | 0              | 4.488040                | -3.323074 | -1.012454 |
| 25               | 6                | 0              | 6.293588                | -0.786697 | -0.499404 |
| 26               | 8                | 0              | 1.762352                | -2.726086 | -0.779830 |
| 27               | 8                | 0              | 0.904262                | 2.832370  | 1.774730  |
| 28               | 6                | 0              | 2.686270                | 2.811038  | -1.060652 |
| 29               | 6                | 0              | 2.382785                | 4.308148  | -0.952963 |
| 30               | 6                | 0              | 3.609498                | 2.590355  | 1.324282  |
| 31               | 1                | 0              | -1.070975               | 1.319289  | 2.028367  |
| 32               | 1                | 0              | -0.214229               | 1.795641  | -0.730003 |
| 33               | 1                | 0              | 0.512264                | -0.580309 | 2.083683  |
| 34               | 1                | 0              | 0.085551                | -0.646946 | -0.951389 |
| 35               | 8                | 0              | -0.395312               | -2.916420 | 1.739003  |
| 36               | 6                | 0              | -3.241568               | -2.375862 | 2.065424  |
| 37               | 6                | 0              | -2.538303               | -3.115534 | -0.246993 |
| 38               | 6                | 0              | -1.802554               | -2.877078 | -1.568906 |
| 39               | 1                | 0              | -6.674321               | 0.667146  | -1.775085 |
| 40               | 1                | 0              | -5.892663               | -0.869659 | -2.187243 |
| 41               | 1                | 0              | -6.695901               | -0.684579 | -0.626488 |
| 42               | 1                | 0              | -5.102399               | 3.519149  | -0.337754 |

|    |   |   |           |           |           |
|----|---|---|-----------|-----------|-----------|
| 43 | 1 | 0 | -6.004537 | 2.593491  | -1.551207 |
| 44 | 1 | 0 | -4.416633 | 3.280393  | -1.934108 |
| 45 | 1 | 0 | 4.154464  | -4.044938 | -0.259573 |
| 46 | 1 | 0 | 5.572959  | -3.383850 | -1.091001 |
| 47 | 1 | 0 | 4.051806  | -3.644274 | -1.963815 |
| 48 | 1 | 0 | 6.600146  | -0.028017 | -1.226905 |
| 49 | 1 | 0 | 6.685441  | -0.481717 | 0.476765  |
| 50 | 1 | 0 | 6.747149  | -1.736697 | -0.774324 |
| 51 | 1 | 0 | 1.997354  | 2.345264  | -1.773828 |
| 52 | 1 | 0 | 3.693954  | 2.666074  | -1.465670 |
| 53 | 1 | 0 | 1.386803  | 4.497087  | -0.540284 |
| 54 | 1 | 0 | 2.420781  | 4.762112  | -1.947754 |
| 55 | 1 | 0 | 3.111139  | 4.828089  | -0.324883 |
| 56 | 1 | 0 | 3.290225  | 3.586267  | 1.630228  |
| 57 | 1 | 0 | 4.613878  | 2.650563  | 0.901520  |
| 58 | 1 | 0 | 3.647863  | 1.963571  | 2.219473  |
| 59 | 1 | 0 | -2.895465 | -3.336280 | 2.453259  |
| 60 | 1 | 0 | -4.295314 | -2.460439 | 1.788798  |
| 61 | 1 | 0 | -3.151611 | -1.626380 | 2.857279  |
| 62 | 1 | 0 | -3.605950 | -3.261432 | -0.435837 |
| 63 | 1 | 0 | -2.167362 | -4.031478 | 0.222539  |
| 64 | 1 | 0 | -2.138277 | -1.956413 | -2.058259 |
| 65 | 1 | 0 | -1.999468 | -3.703175 | -2.259703 |
| 66 | 1 | 0 | -0.719001 | -2.817090 | -1.425181 |

**Table S10.** Computational details for ECD of compound **3b**

**3b-1**

Standard orientation:

| Center<br>Number | Atomic<br>Number | Atomic<br>Type | Coordinates (Angstroms) |           |           |
|------------------|------------------|----------------|-------------------------|-----------|-----------|
|                  |                  |                | X                       | Y         | Z         |
| 1                | 6                | 0              | 2.822216                | -0.633339 | 0.027673  |
| 2                | 6                | 0              | 2.245413                | -1.951580 | 0.507106  |
| 3                | 6                | 0              | 0.878336                | -1.760159 | 1.195114  |
| 4                | 6                | 0              | 0.156544                | -0.447458 | 1.050988  |
| 5                | 6                | 0              | 0.980029                | 0.854327  | 0.844157  |
| 6                | 6                | 0              | 2.305982                | 0.610741  | 0.182455  |
| 7                | 6                | 0              | 3.049635                | 1.771372  | -0.314275 |
| 8                | 6                | 0              | 4.331992                | 1.498967  | -0.970689 |
| 9                | 6                | 0              | 4.757690                | 0.213908  | -1.082865 |
| 10               | 8                | 0              | 4.017208                | -0.826361 | -0.591364 |
| 11               | 6                | 0              | -0.589060               | -0.124150 | -0.310299 |
| 12               | 6                | 0              | -0.122593               | 1.339957  | -0.146004 |
| 13               | 6                | 0              | -2.053130               | -0.369596 | -0.437181 |
| 14               | 6                | 0              | -2.945071               | 0.637465  | -0.274584 |

|    |   |   |           |           |           |
|----|---|---|-----------|-----------|-----------|
| 15 | 6 | 0 | -2.637292 | 2.085659  | 0.064180  |
| 16 | 6 | 0 | -1.162109 | 2.243563  | 0.498683  |
| 17 | 6 | 0 | -2.516196 | -1.705910 | -0.806996 |
| 18 | 6 | 0 | -3.965211 | -1.871719 | -0.961875 |
| 19 | 6 | 0 | -4.778903 | -0.799544 | -0.773997 |
| 20 | 8 | 0 | -4.275428 | 0.432008  | -0.442460 |
| 21 | 8 | 0 | 2.611387  | 2.927667  | -0.184614 |
| 22 | 8 | 0 | 0.393216  | -2.677849 | 1.837846  |
| 23 | 6 | 0 | 2.025454  | -2.913046 | -0.695006 |
| 24 | 6 | 0 | 3.226545  | -2.629329 | 1.512086  |
| 25 | 6 | 0 | 3.574582  | -1.797365 | 2.749476  |
| 26 | 8 | 0 | -0.840019 | 3.110840  | 1.291402  |
| 27 | 6 | 0 | -2.820654 | 2.954482  | -1.216392 |
| 28 | 6 | 0 | -3.580721 | 2.616897  | 1.176305  |
| 29 | 6 | 0 | -3.573166 | 1.814672  | 2.481224  |
| 30 | 8 | 0 | -1.720378 | -2.643959 | -0.987496 |
| 31 | 1 | 0 | 1.098007  | 1.497313  | 1.720158  |
| 32 | 1 | 0 | 0.229749  | 1.841109  | -1.053897 |
| 33 | 1 | 0 | -0.547143 | -0.357405 | 1.882234  |
| 34 | 1 | 0 | -0.070743 | -0.610388 | -1.139239 |
| 35 | 6 | 0 | 6.012258  | -0.312478 | -1.704990 |
| 36 | 6 | 0 | 5.087080  | 2.696102  | -1.479082 |
| 37 | 6 | 0 | -4.440732 | -3.250025 | -1.330567 |
| 38 | 6 | 0 | -6.269255 | -0.720067 | -0.873598 |
| 39 | 1 | 0 | 1.294847  | -2.518203 | -1.405475 |
| 40 | 1 | 0 | 2.969459  | -3.080126 | -1.218139 |
| 41 | 1 | 0 | 1.652629  | -3.869821 | -0.322366 |
| 42 | 1 | 0 | 2.758047  | -3.568568 | 1.818696  |
| 43 | 1 | 0 | 4.139480  | -2.884712 | 0.965492  |
| 44 | 1 | 0 | 4.258870  | -2.354231 | 3.396695  |
| 45 | 1 | 0 | 4.063582  | -0.854401 | 2.485014  |
| 46 | 1 | 0 | 2.683307  | -1.560257 | 3.339596  |
| 47 | 1 | 0 | -3.850128 | 2.869586  | -1.573731 |
| 48 | 1 | 0 | -2.617118 | 4.003269  | -0.983868 |
| 49 | 1 | 0 | -2.151397 | 2.637509  | -2.020820 |
| 50 | 1 | 0 | -3.281924 | 3.648900  | 1.378433  |
| 51 | 1 | 0 | -4.595075 | 2.649816  | 0.768147  |
| 52 | 1 | 0 | -4.252193 | 2.272207  | 3.207311  |
| 53 | 1 | 0 | -3.904118 | 0.782679  | 2.327493  |
| 54 | 1 | 0 | -2.576526 | 1.789265  | 2.931358  |
| 55 | 1 | 0 | 6.622372  | 0.482279  | -2.129217 |
| 56 | 1 | 0 | 6.606012  | -0.847556 | -0.956324 |
| 57 | 1 | 0 | 5.765288  | -1.025988 | -2.498001 |
| 58 | 1 | 0 | 6.023657  | 2.434337  | -1.970460 |
| 59 | 1 | 0 | 4.468665  | 3.257132  | -2.187347 |
| 60 | 1 | 0 | 5.309692  | 3.379840  | -0.653173 |
| 61 | 1 | 0 | -5.518171 | -3.305906 | -1.481791 |



|    |   |   |           |           |           |
|----|---|---|-----------|-----------|-----------|
| 62 | 1 | 0 | -3.942524 | -3.583259 | -2.246517 |
| 63 | 1 | 0 | -4.163701 | -3.966039 | -0.549407 |
| 64 | 1 | 0 | -6.709769 | -1.671229 | -1.165174 |
| 65 | 1 | 0 | -6.693764 | -0.419388 | 0.090149  |
| 66 | 1 | 0 | -6.555226 | 0.039373  | -1.608634 |

## References

[1] Frisch, M. J.; Trucks, G. W.; Schlegel, H. B.; Scuseria, G. E.; Robb, M. A.; Cheeseman, J. R.; Scalmani, G.; Barone, V.; Mennucci, B.; Petersson, G. A.; Nakatsuji, H.; Caricato, M.; Li, X.; Hratchian, H. P.; Izmaylov, A. F.; Bloino, J.; Zheng, G.; Sonnenberg, J. L.; Hada, M.; Ehara, M.; Toyota, K.; Fukuda, R.; Hasegawa, J.; Ishida, M.; Nakajima, T.; Honda, Y.; Kitao, O.; Nakai, H.; Vreven, T.; Montgomery, J. A., Jr.; Peralta, J. E.; Ogliaro, F.; Bearpark, M.; Heyd, J. J.; Brothers, E.; Kudin, K. N.; Staroverov, V. N.; Kobayashi, R.; Normand, J.; Raghavachari, K.; Rendell, A.; Burant, J. C.; Iyengar, S. S.; Tomasi, J.; Cossi, M.; Rega, N.; Millam, J. M.; Klene, M.; Knox, J. E.; Cross, J. B.; Bakken, V.; Adamo, C.; Jaramillo, J.; Gomperts, R.; Stratmann, R. E.; Yazyev, O.; Austin, A. J.; Cammi, R.; Pomelli, C.; Ochterski, J. W.; Martin, R. L.; Morokuma, K.; Zakrzewski, V. G.; Voth, G. A.; Salvador, P.; Dannenberg, J. J.; Dapprich, S.; Daniels, A. D.; Farkas, O.; Foresman, J. B.; Ortiz, J. V.; Cioslowski, J.; Fox, D. J. Gaussian 09, Revision C1; Gaussian, Inc.: Wallingford, CT, 2010.

[2] Bruhn, T.; Schaumlöffel, A.; Hemberger, Y.; Bringmann, G. Quantifying the Comparison of Calculated and Experimental Electronic Circular Dichroism Spectra, *Chirality* 2013, 25, 243–249.

**Table S11.** 2D Structures of **3a** and **3b**

| label     | structure |
|-----------|-----------|
| <b>3a</b> |           |
| <b>3b</b> |           |

| B3LYP/6-31G (d, p) optimized lowest energy 3D conformers of <b>3a</b> |                                                                                      |                             |
|-----------------------------------------------------------------------|--------------------------------------------------------------------------------------|-----------------------------|
| label                                                                 | conformer                                                                            | Boltzmann weighting factors |
| 3a-1                                                                  | 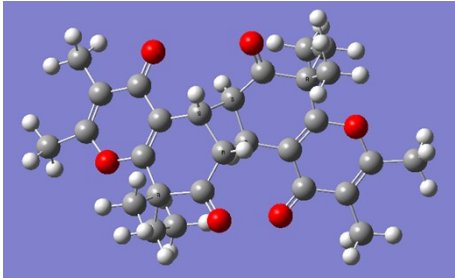   | 37.39                       |
| 3a-2                                                                  |    | 62.61                       |
| B3LYP/6-31G (d, p) optimized lowest energy 3D conformers of <b>3b</b> |                                                                                      |                             |
| label                                                                 | conformer                                                                            | Boltzmann weighting factors |
| 3b-1                                                                  |  | 100                         |

**Figure S31.** B3LYP/6-31 G (d, p) optimized lowest energy 3D conformer of **3**

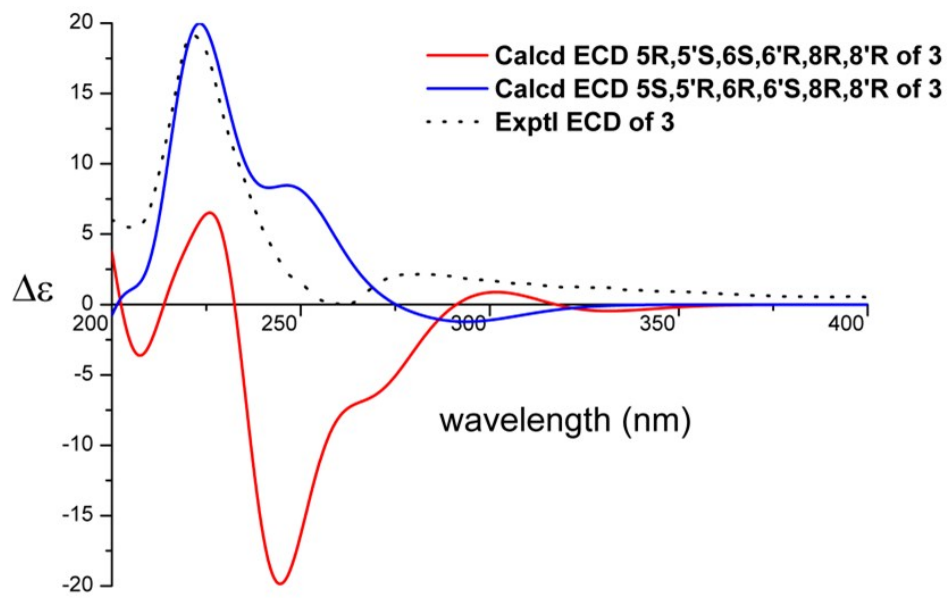

Figure S32. Experimental and calculated ECD spectra of 3

## 9. The spectra of spiciferone A (4)

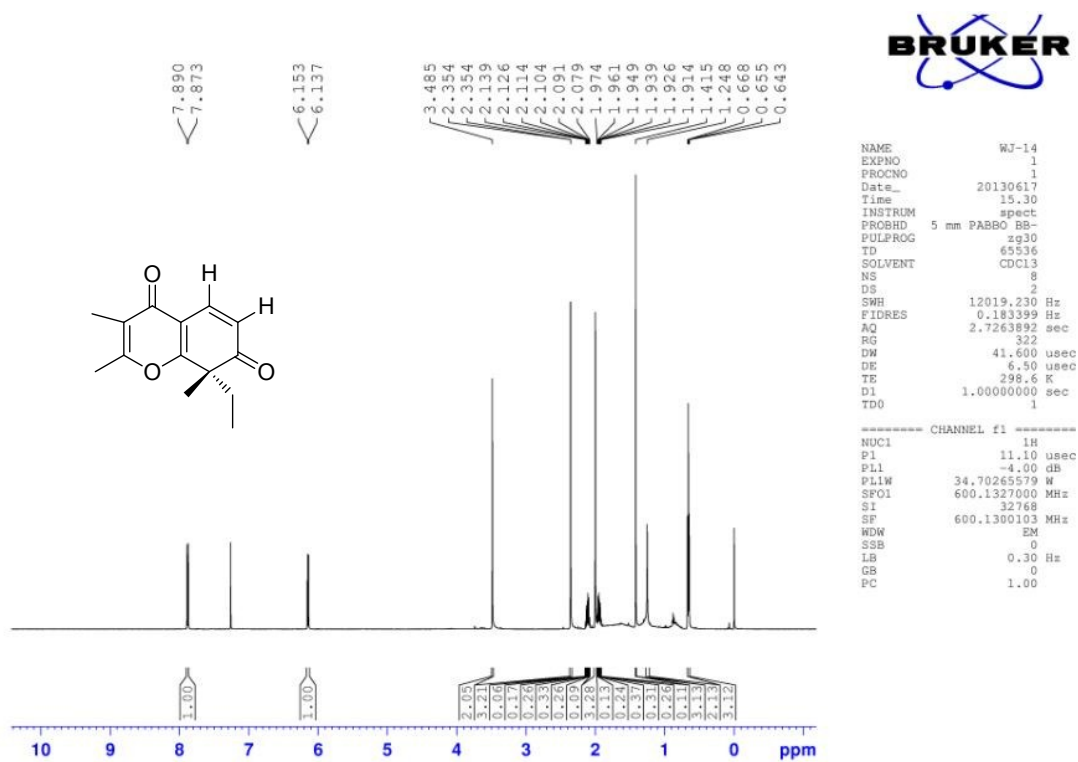

Figure S33. The  $^1\text{H-NMR}$  spectrum of compound 4

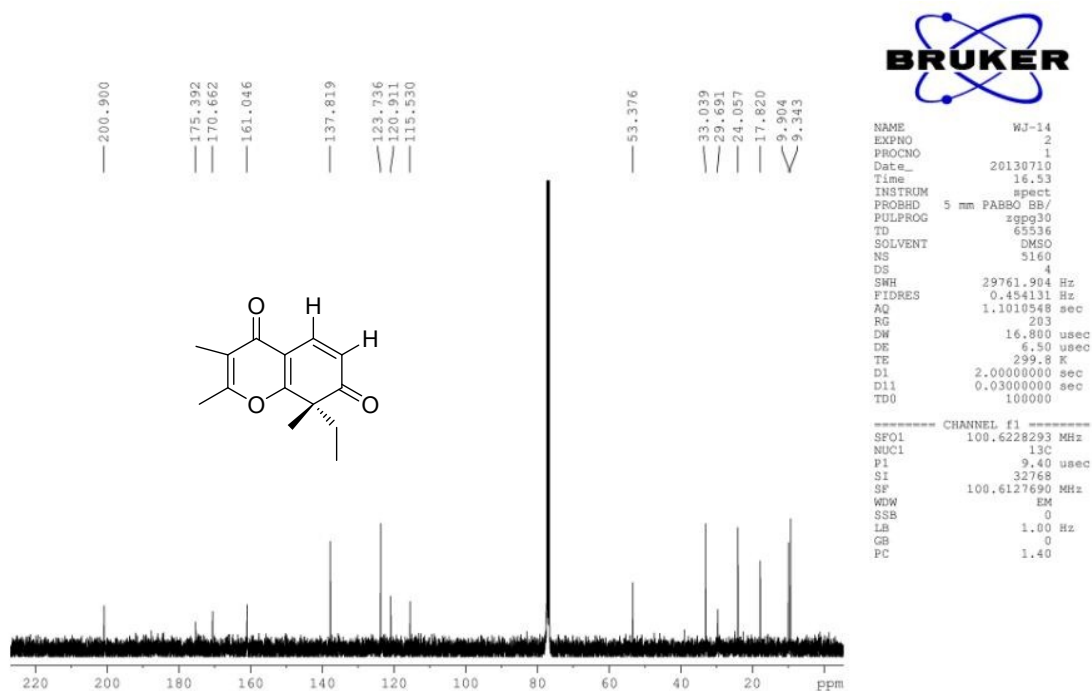

Figure S34. The  $^{13}\text{C}$ -NMR spectrum of compound 4

## 10. Photochemical synthesis of spiciferone A dimers

The photochemical synthesis was carried out in solution and solid states, respectively. A saturated solution of spiciferone A (**4**) (2.0 mg, 0.086 mmol) in 2.0 mL of EtOAc, kept in a vial of 10 mL, was exposed to normal environment of the laboratory where the extraction and isolation were performed. The reaction was monitored by silica gel TLC and HPLC/DAD (Fig. S35). Since it reached a balance, the reaction was stopped after 5 days (Fig. S36). Other different solvents, including MeOH and acetone, were also investigated. In the solid state, compound **4** was kept in a vial and exposed for 5 days.

## 11. HPLC/DAD analyses of photoreaction mixtures and crude EtOAc extract of strain PR-M-3

Fermentation of the strain PR-M-3 was carried out in dark. Then the fermentation broth was filtered and extracted by EtOAc, and extreme care was taken to avoid light-irradiation during the procedure of filtration and extraction. The EtOAc crude extract was detected by HPLC/DAD (Fig. S37).

Chromatographic conditions: Analytic HPLC was carried out on a Shimazu LC-20AB

high performance liquid chromatography system with a SPD-M20A DAD detector. All the separations were carried out at 25 °C on a Phenomenex ODS column (4.6 mm × 250 mm, i.d. 5 μm). Detection wavelength was set at 254 nm.

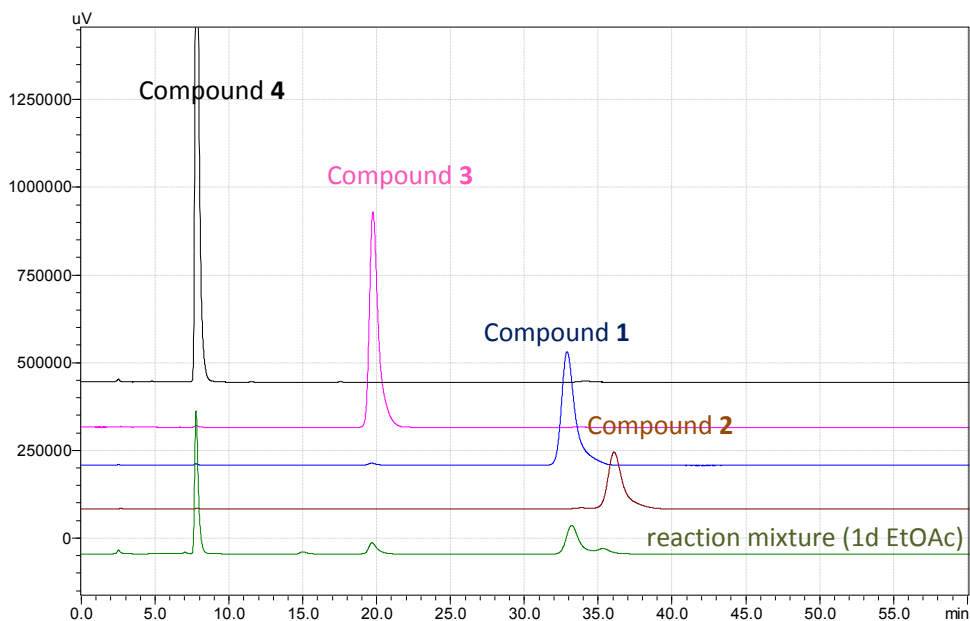

**Figure S35.** HPLC analysis of the reaction mixture using MeOH-H<sub>2</sub>O (70:30, 1 mL/min) as eluent

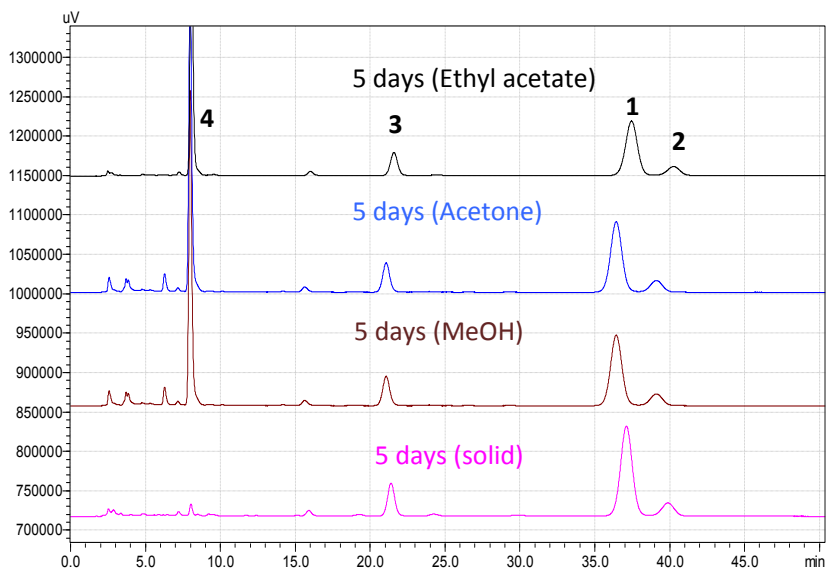

**Figure S36.** HPLC analysis of photoreaction mixtures in different solvents at 5<sup>th</sup> day using MeOH-H<sub>2</sub>O (70:30, 1 mL/min) as eluent

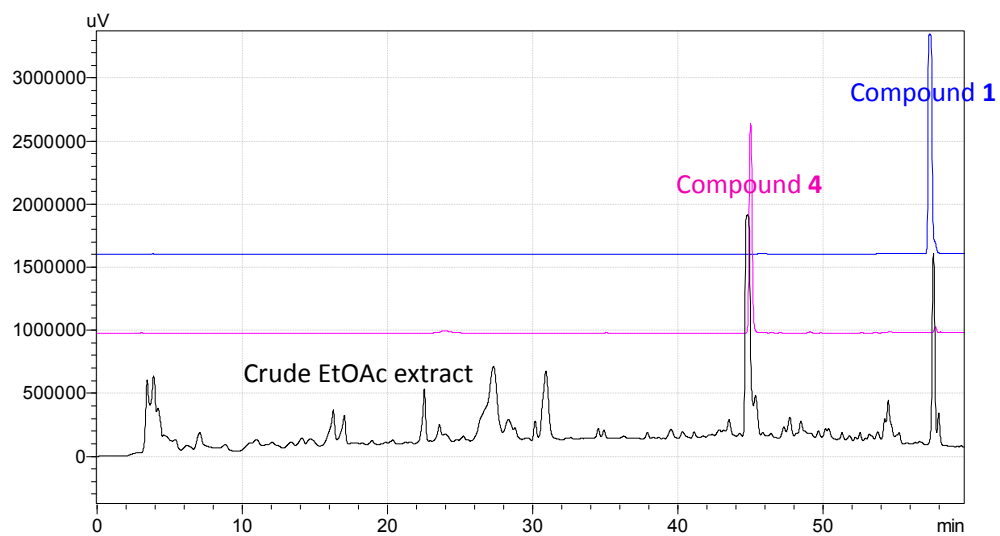

**Figure S37.** HPLC analysis of crude EtOAc extract of strain PR-M-3 using MeOH-H<sub>2</sub>O (5:95-100:0, 1 mL/min) gradient elution
